# Supplementary material for: Weighted multiple testing procedures in genome-wide association studies
Source: PeerJ journal article supplement (doi:10.7717/peerj.15369), 2023-06-15
Supplement: PeerJ_SuppMat_wFig.pdf [file PeerJ_SuppMat_wFig.pdf]

1 **SUPPLEMENTARY MATERIALS FOR "WEIGHTED MULTIPLE TESTING**  
 2 **PROCEDURES IN GENOME-WIDE ASSOCIATION STUDIES"**

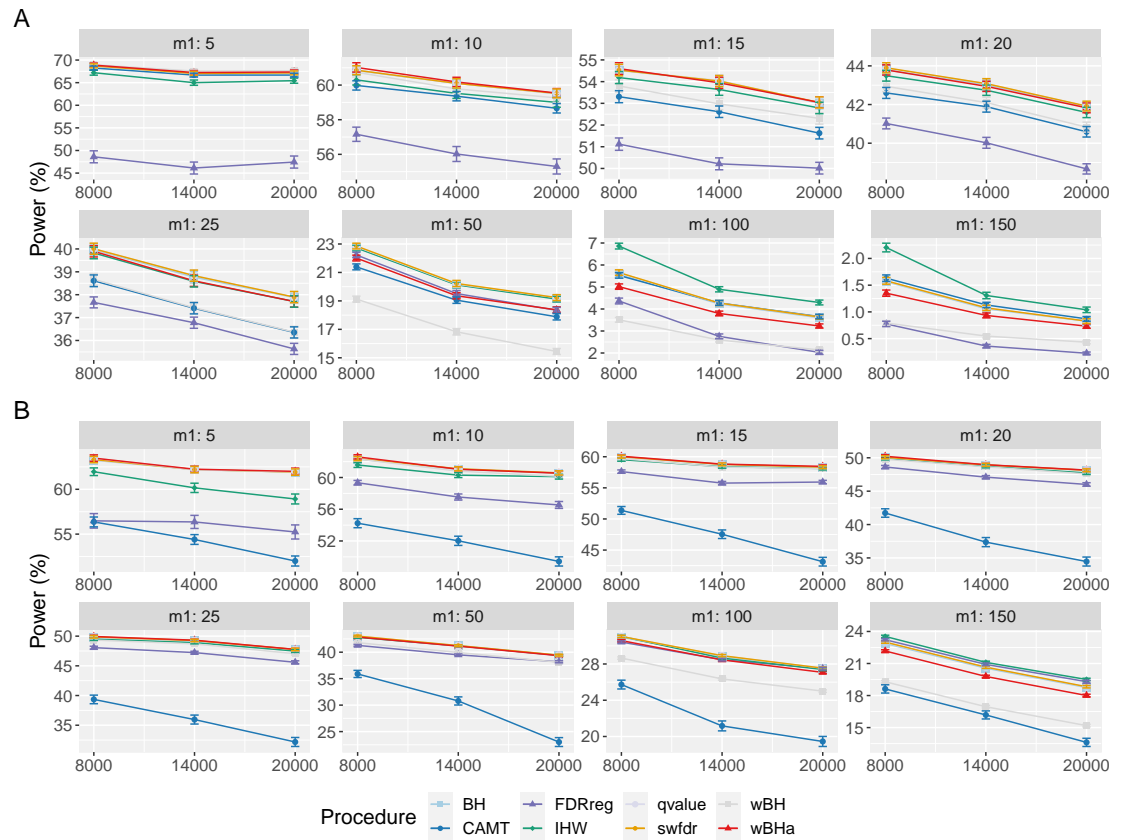

**Figure S1. Overall power** comparison in **scenario 2**, with **independent** markers ( $\rho = 0$ ), for different  $m$  and  $m_1$  values. Panels A and B display results for quantitative and binary traits, respectively. Vertical bars illustrate standard errors.

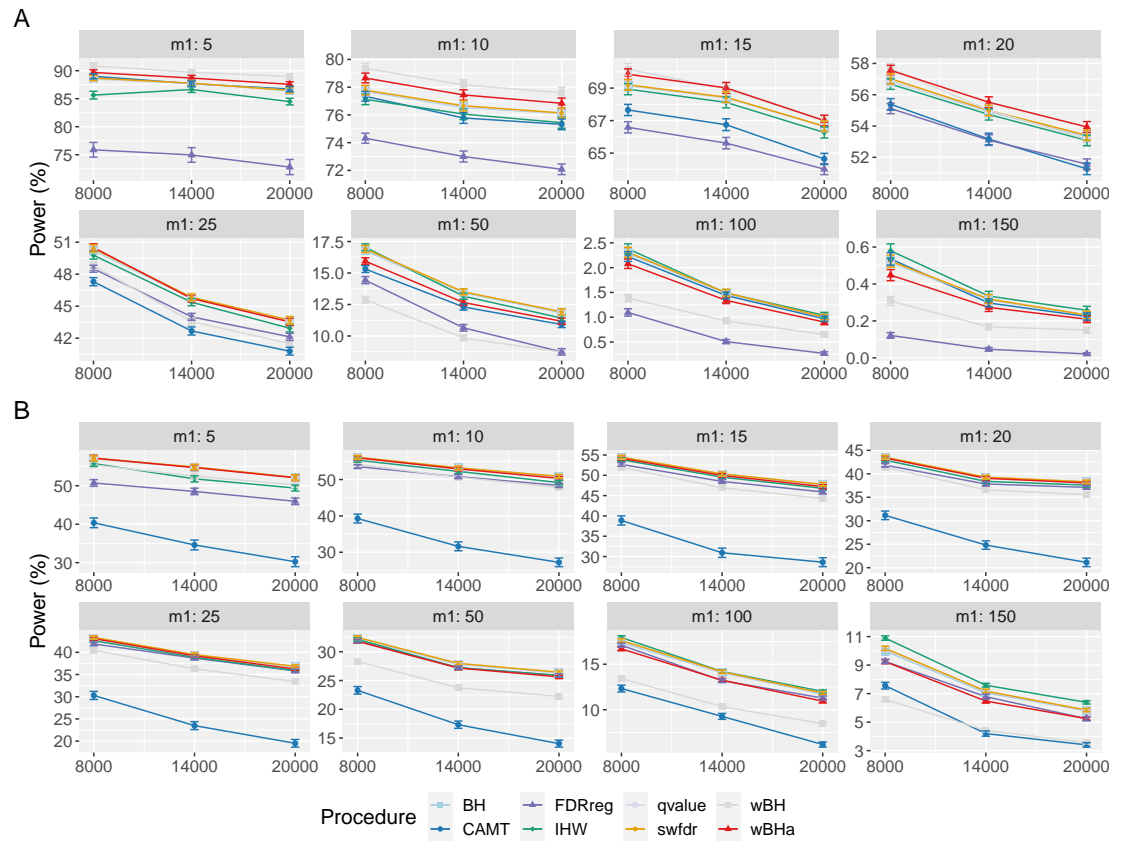

**Figure S2. Overall power** comparison in **scenario 3**, with **independent** markers ( $\rho = 0$ ), for different  $m$  and  $m_1$  values. Panels A and B display results for quantitative and binary traits, respectively. Vertical bars illustrate standard errors.

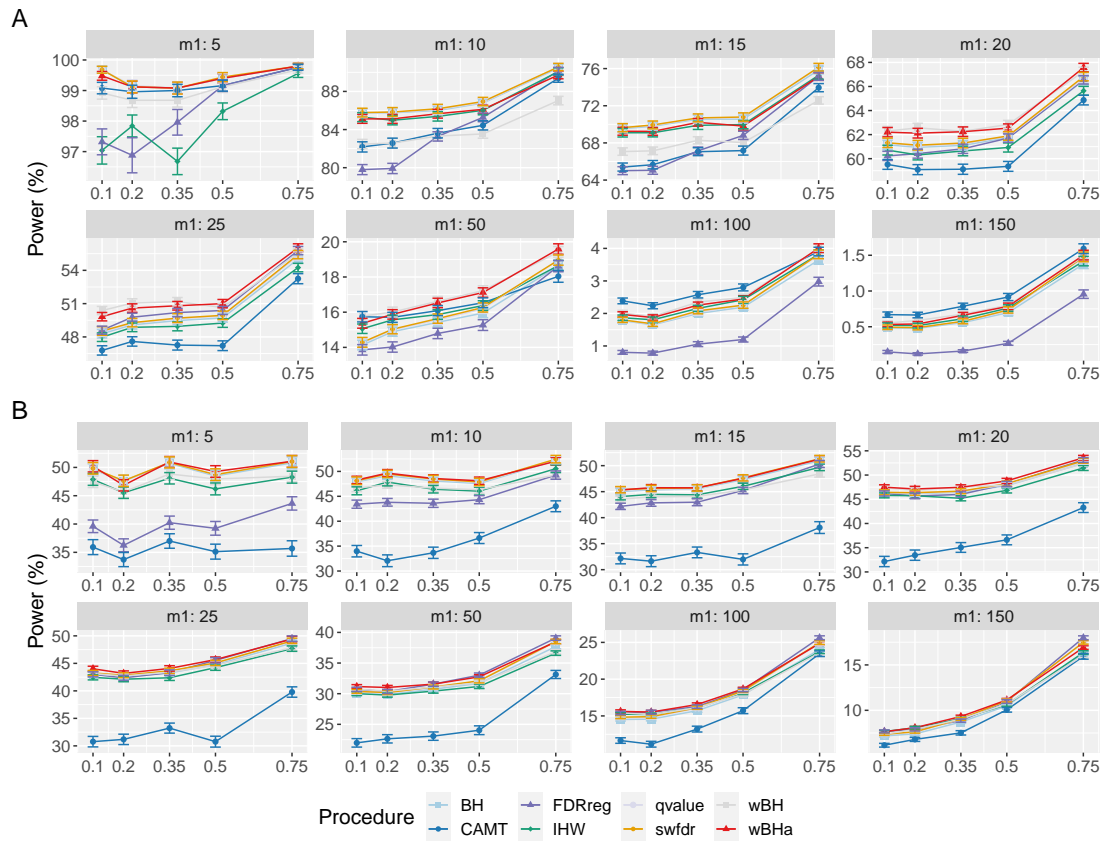

**Figure S3. Overall power** comparison in **scenario 1**, with **correlated** markers, for different  $\rho$  and  $m_1$  values with  $m = 8000$ . Panels A and B display results for quantitative and binary traits, respectively. Vertical bars illustrate standard errors.

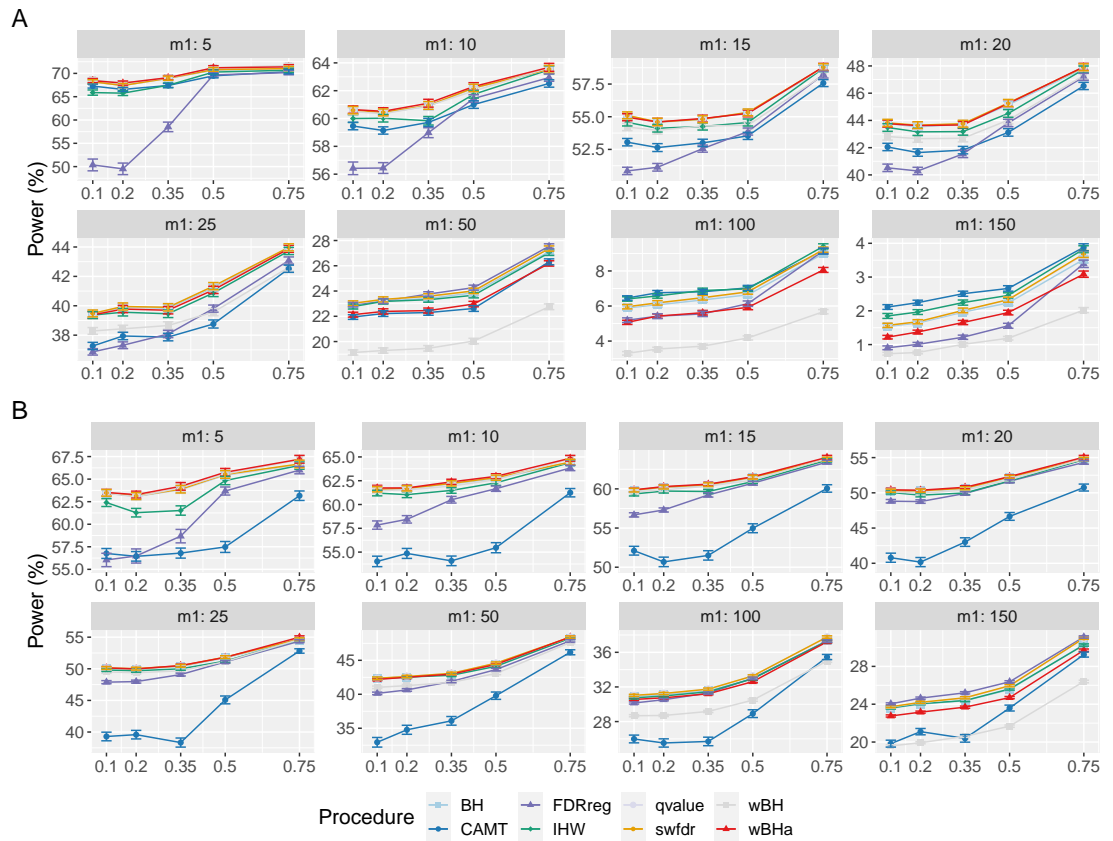

**Figure S4. Overall power** comparison in **scenario 2**, with **correlated** markers, for different  $\rho$  and  $m_1$  values with  $m = 8000$ . Panels A and B display results for quantitative and binary traits, respectively. Vertical bars illustrate standard errors.

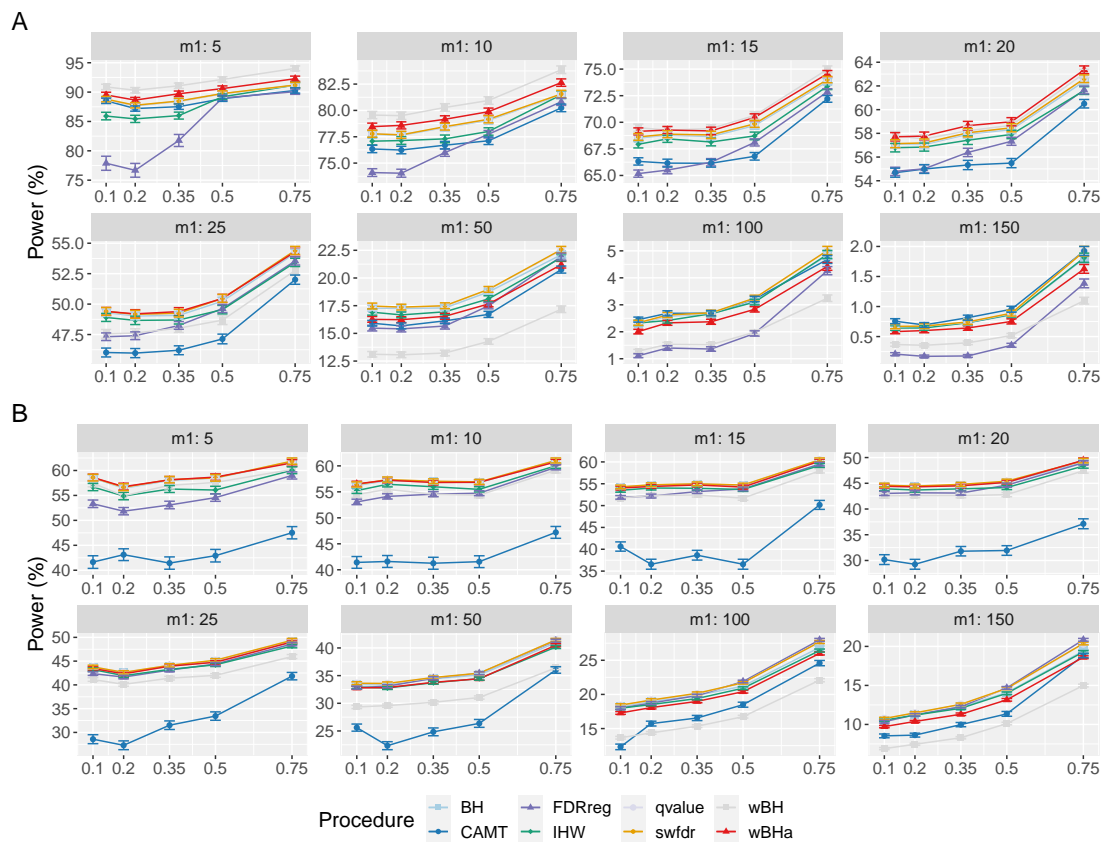

**Figure S5. Overall power** comparison in **scenario 3**, with **correlated** markers, for different  $\rho$  and  $m_1$  values with  $m = 8000$ . Panels A and B display results for quantitative and binary traits, respectively. Vertical bars illustrate standard errors.

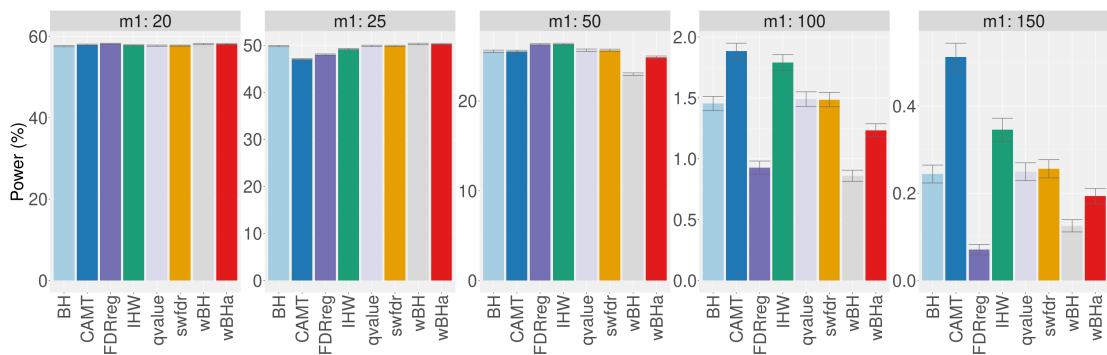

**Figure S6. Overall power** comparison in **scenario 2**, with simulations based on **real data**, for different  $m_1$  values. Vertical bars illustrate standard errors.

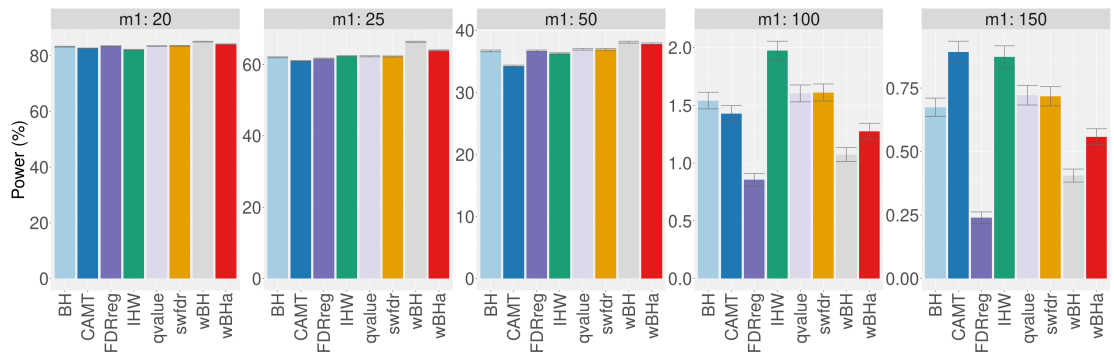

**Figure S7. Overall power** comparison in **scenario 3**, with simulations based on **real data**, for different  $m_1$  values. Vertical bars illustrate standard errors.

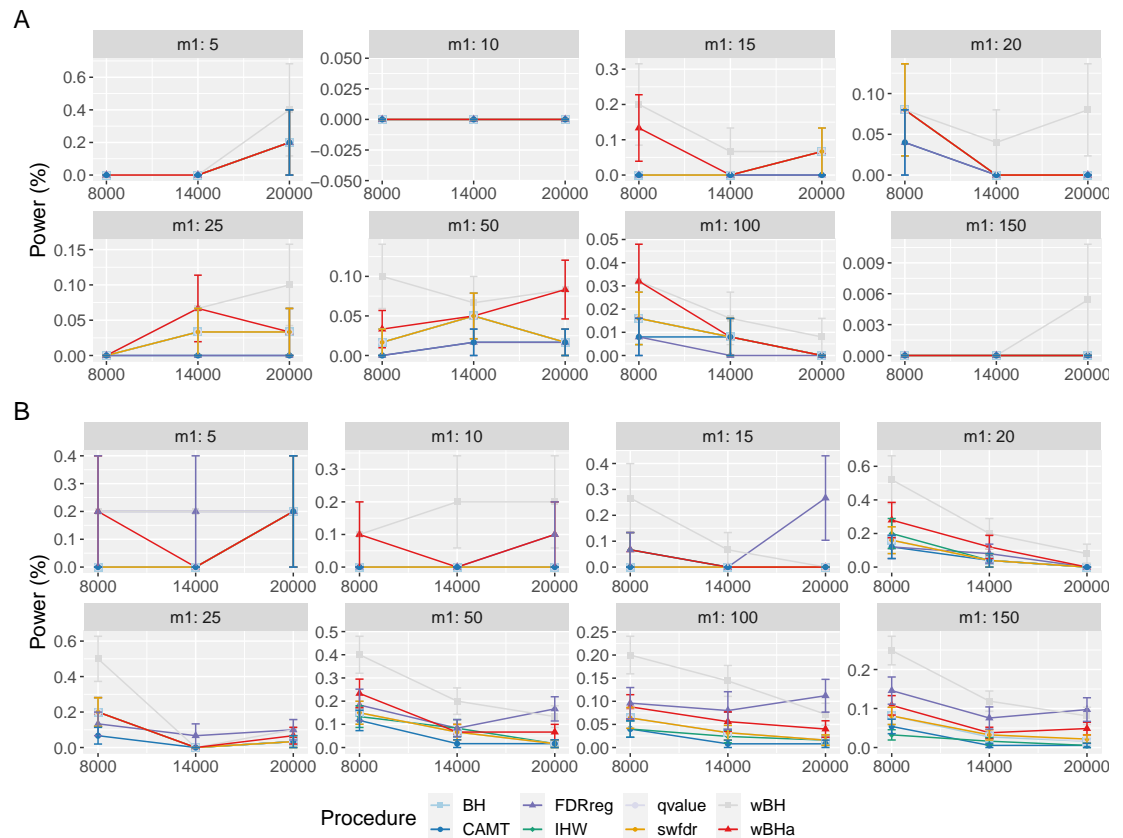

**Figure S8. Power** comparison in subgroup of **rare variants** in **scenario 2**, with **independent** markers ( $\rho = 0$ ), for different  $m$  and  $m_1$  values. Panels A and B display results for quantitative and binary traits, respectively. Vertical bars illustrate standard errors.

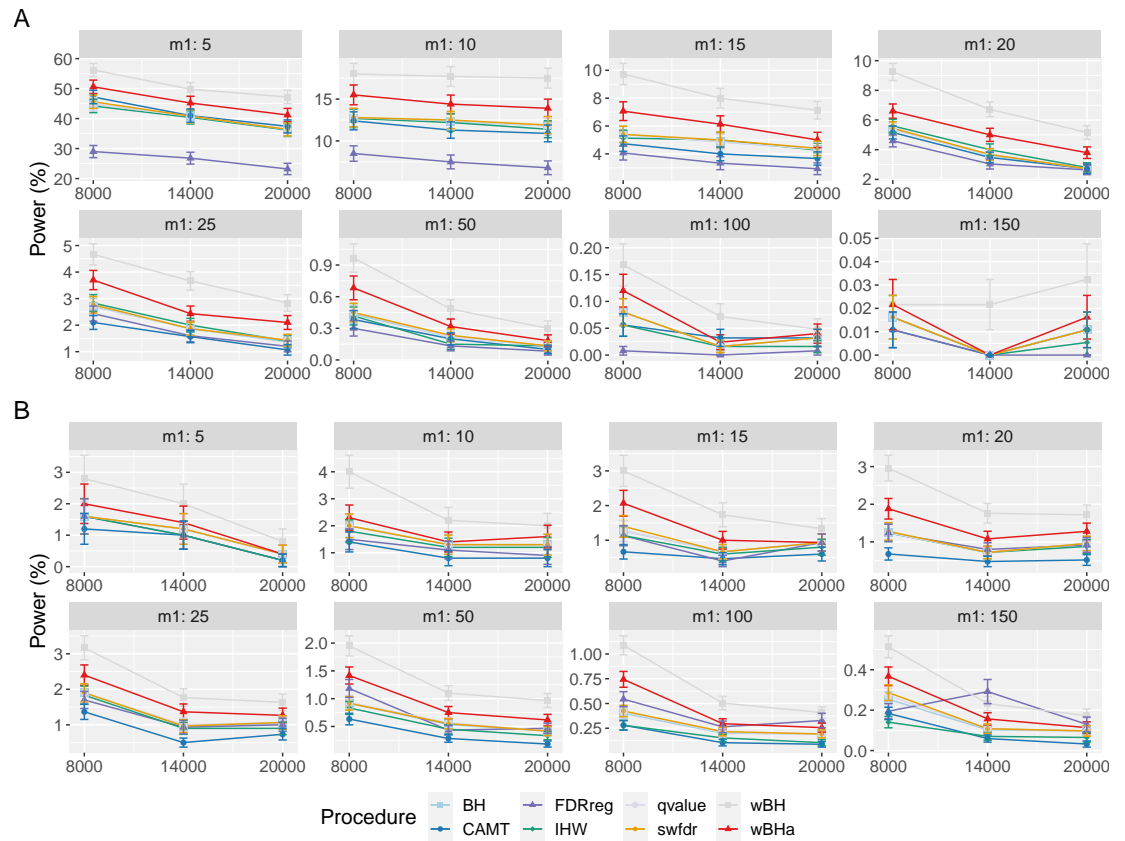

**Figure S9.** Power comparison in subgroup of **rare variants** in **scenario 3**, with **independent** markers ( $\rho = 0$ ), for different  $m$  and  $m_1$  values. Panels A and B display results for quantitative and binary traits, respectively. Vertical bars illustrate standard errors.

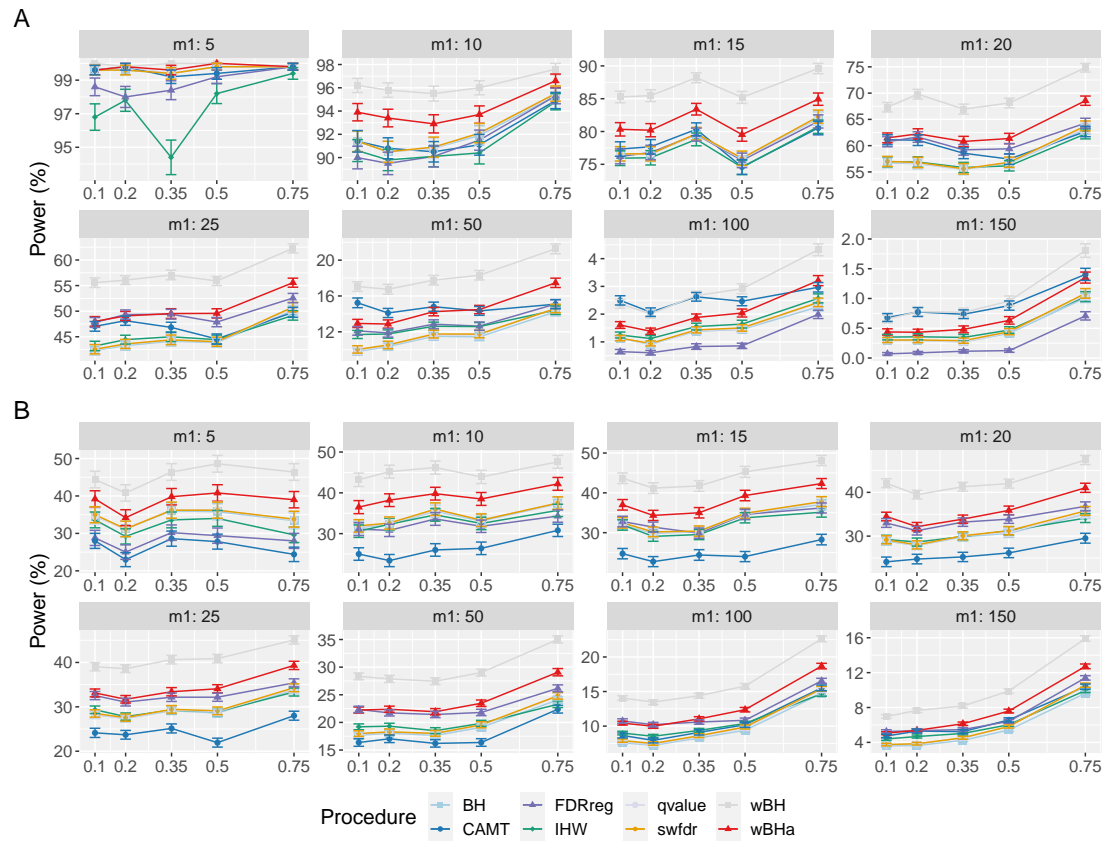

**Figure S10.** Power comparison in subgroup of rare variants in scenario 1, with correlated markers, for different  $\rho$  and  $m_1$  values with  $m = 8000$ . Panels A and B display results for quantitative and binary traits, respectively. Vertical bars illustrate standard errors.



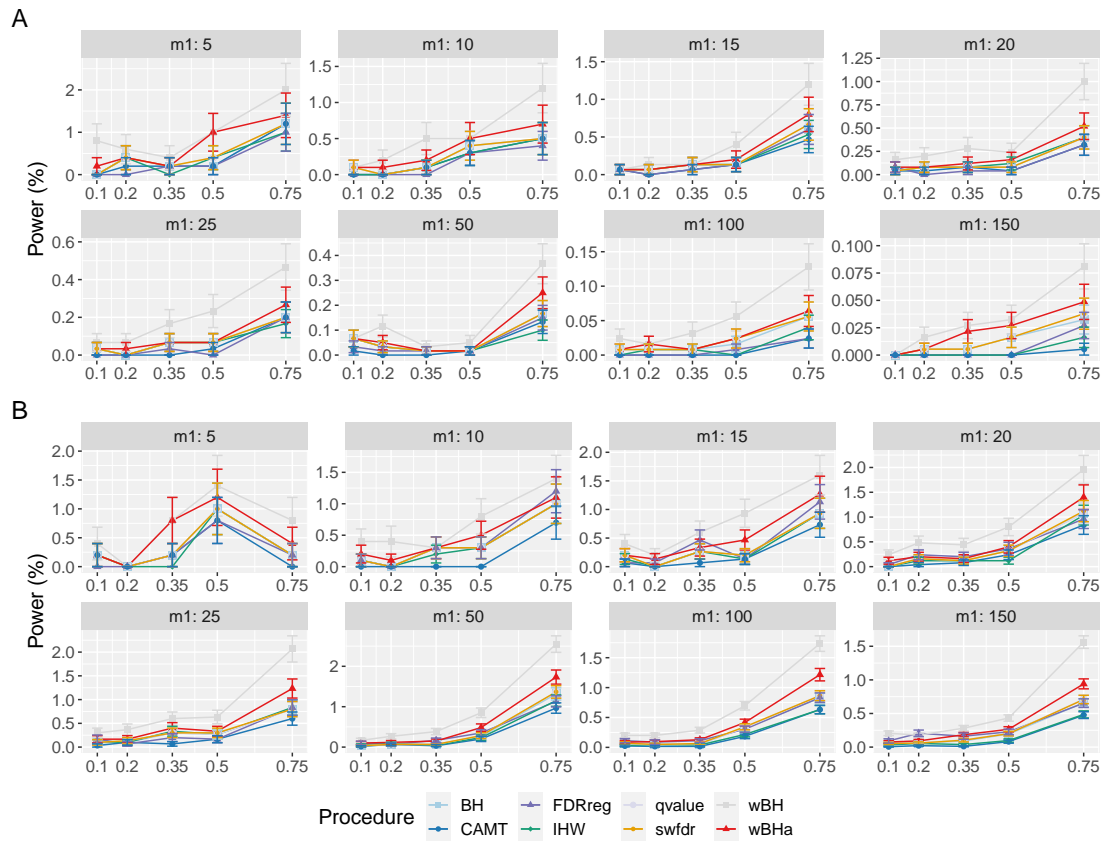

**Figure S11.** Power comparison in subgroup of **rare variants** in **scenario 2**, with **correlated** markers, for different  $\rho$  and  $m_1$  values with  $m = 8000$ . Panels A and B display results for quantitative and binary traits, respectively. Vertical bars illustrate standard errors.

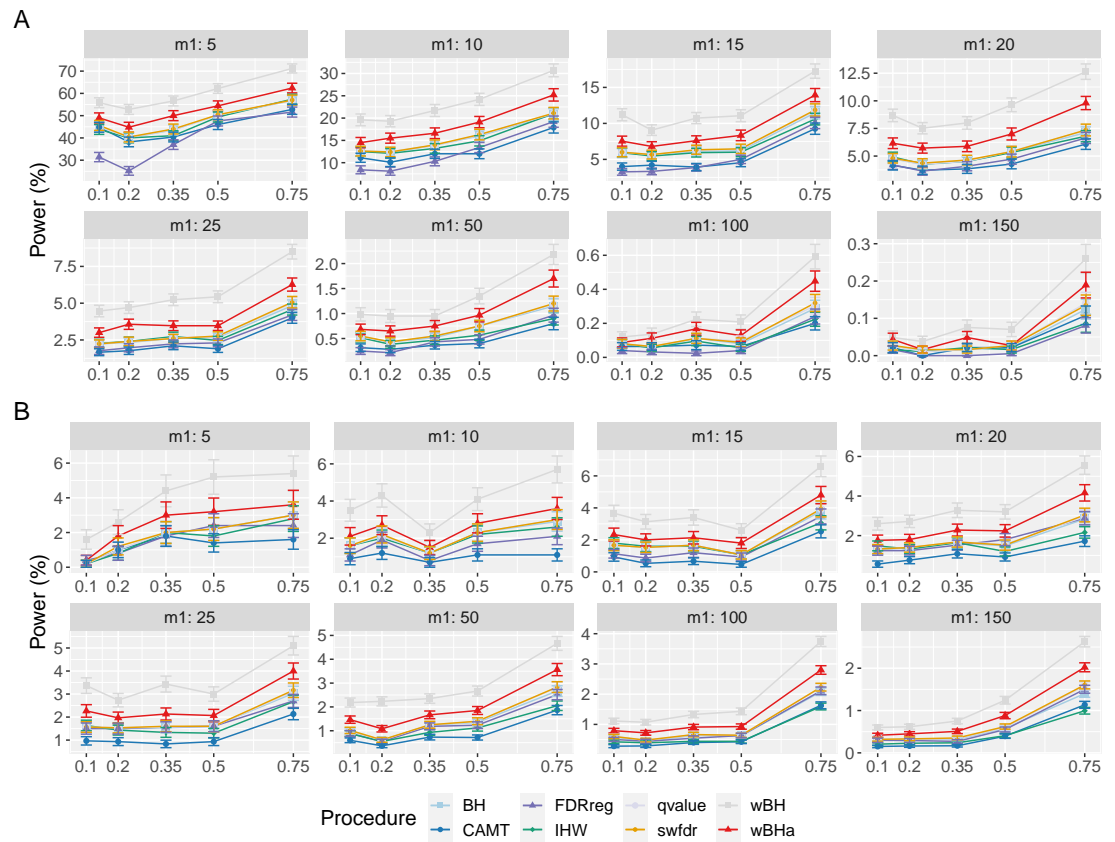

**Figure S12.** Power comparison in subgroup of **rare variants** in **scenario 3**, with **correlated** markers, for different  $\rho$  and  $m_1$  values with  $m = 8000$ . Panels A and B display results for quantitative and binary traits, respectively. Vertical bars illustrate standard errors.

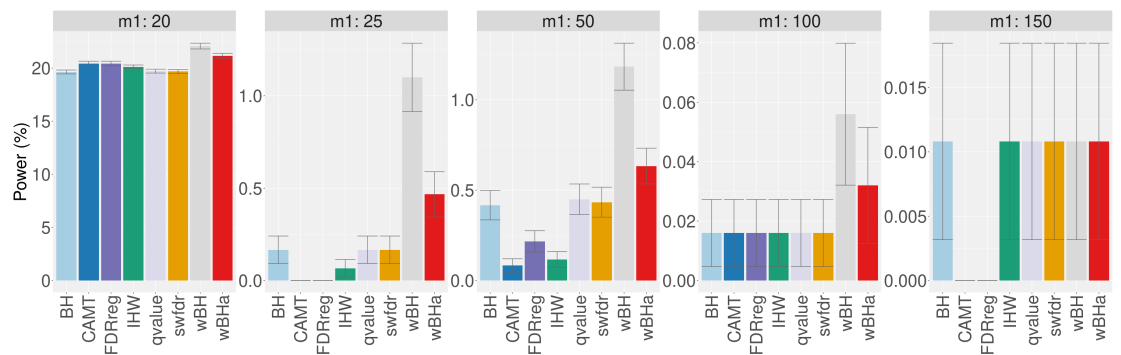

**Figure S13.** Power comparison in subgroup of **rare variants** in **scenario 2**, with simulations based on **real data**, for different  $m_1$  values. Vertical bars illustrate standard errors.

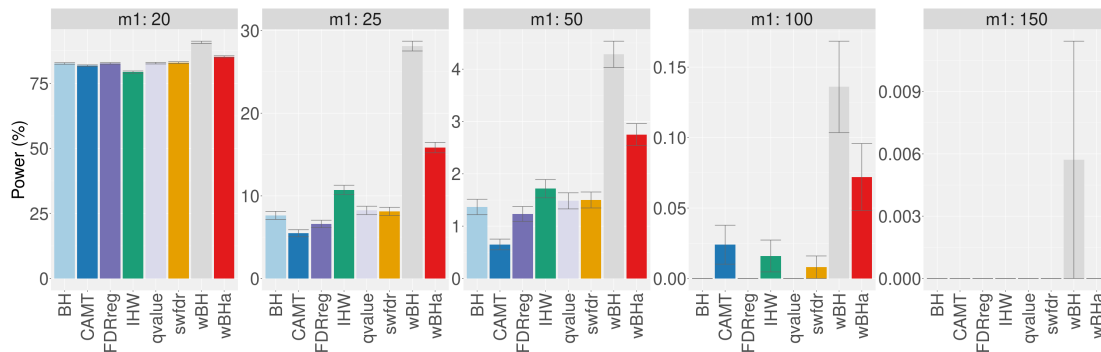

**Figure S14.** Power comparison in subgroup of **rare variants** in **scenario 3**, with simulations based on **real data**, for different  $m_1$  values. Vertical bars illustrate standard errors.

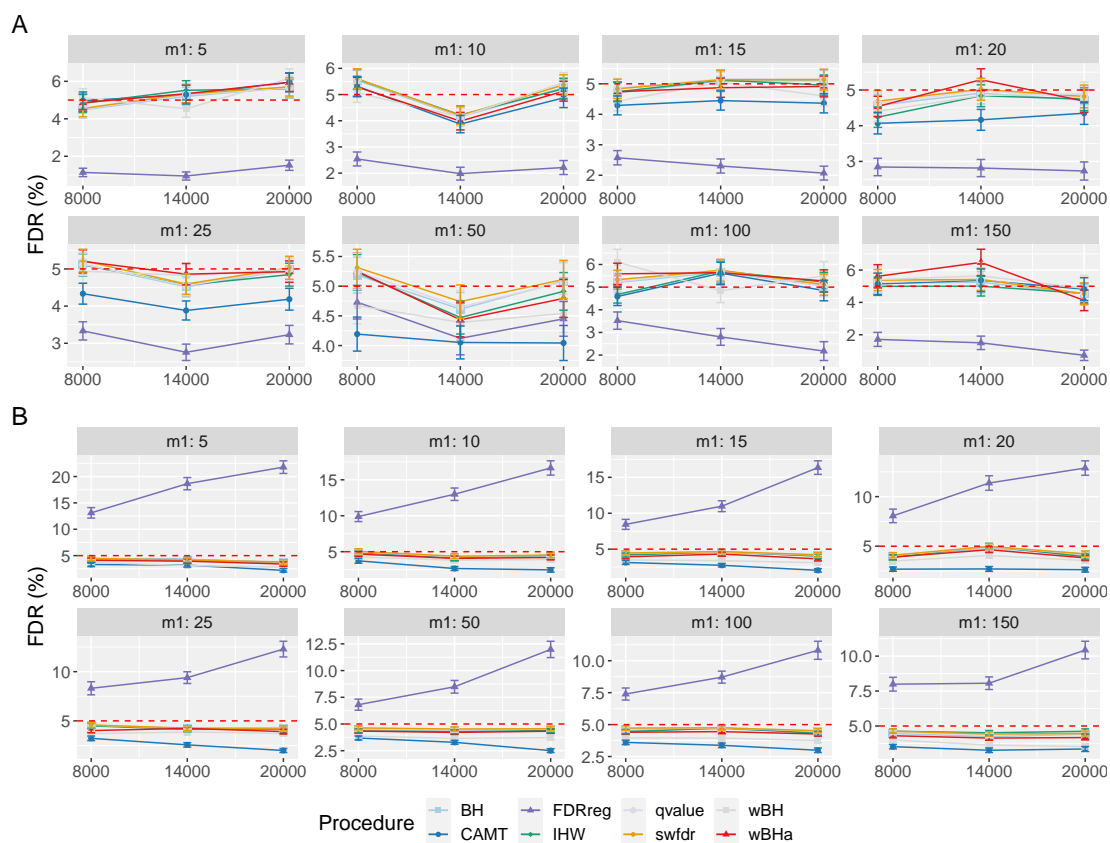

**Figure S15.** **FDR** comparison in **scenario 2**, with **independent** markers ( $\rho = 0$ ), for different  $m$  and  $m_1$  values. Panels A and B display results for quantitative and binary traits, respectively. Red dashed line corresponds to target FDR level (5%). Vertical bars illustrate standard errors.

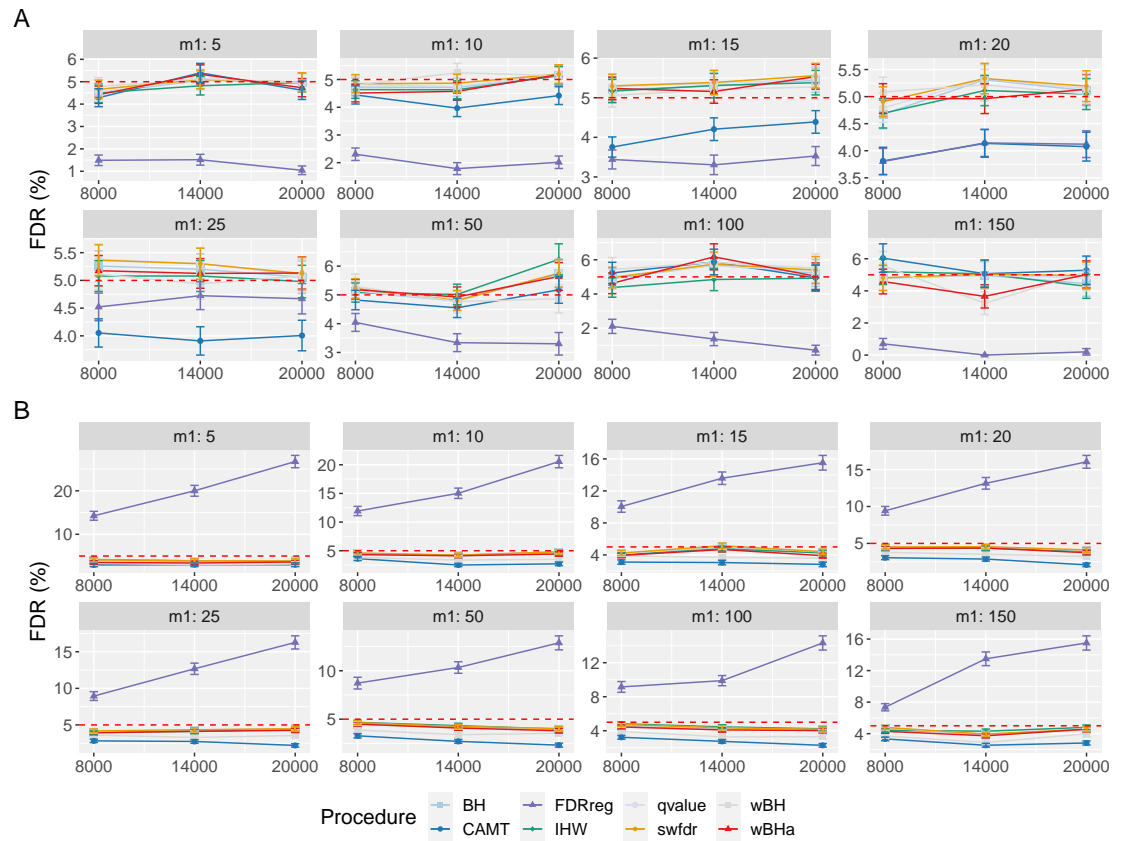

**Figure S16. FDR comparison in scenario 3, with independent markers ( $\rho = 0$ ), for different  $m$  and  $m_1$  values. Panels A and B display results for quantitative and binary traits, respectively. Red dashed line corresponds to target FDR level (5%). Vertical bars illustrate standard errors.**

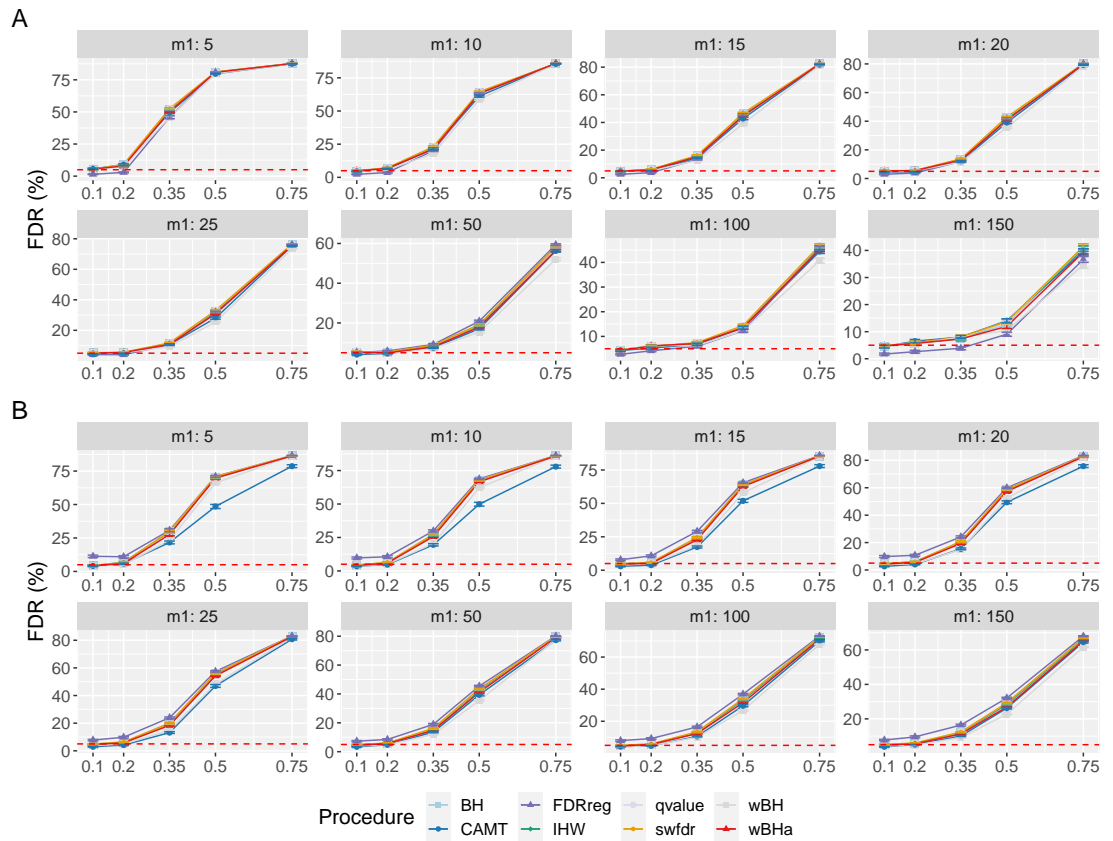

**Figure S17. FDR comparison in scenario 2, with correlated markers, for different  $\rho$  and  $m_1$  values with  $m = 8000$ . Panels A and B display results for quantitative and binary traits, respectively. Red dashed line corresponds to target FDR level (5%). Vertical bars illustrate standard errors.**

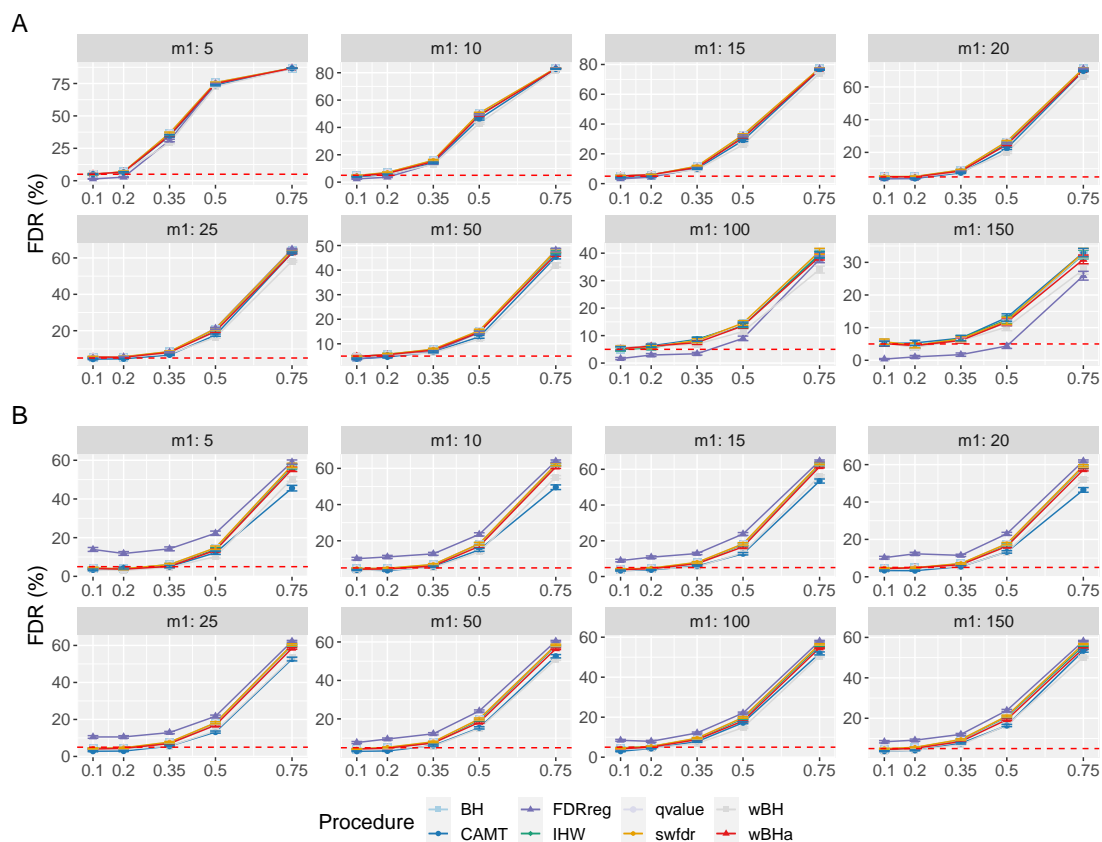

**Figure S18. FDR comparison in scenario 3, with correlated markers, for different  $\rho$  and  $m_1$  values with  $m = 8000$ . Panels A and B display results for quantitative and binary traits, respectively. Red dashed line corresponds to target FDR level (5%). Vertical bars illustrate standard errors.**

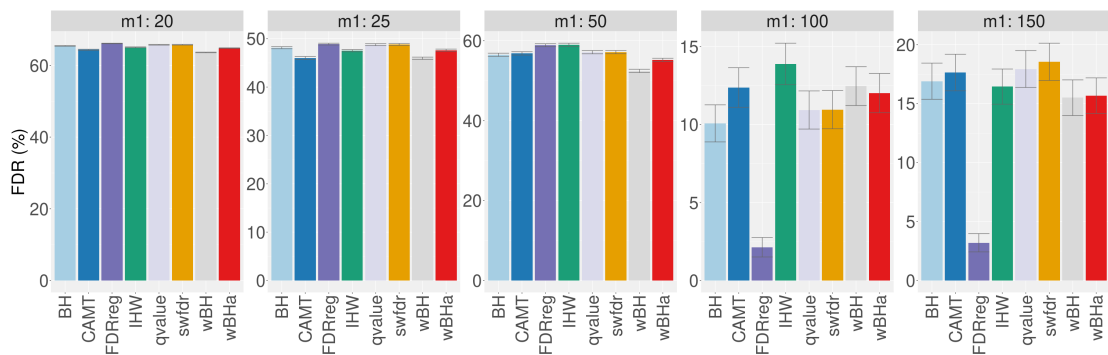

**Figure S19. FDR comparison in scenario 1, with simulations based on real data, for different  $m_1$  values. Vertical bars illustrate standard errors.**

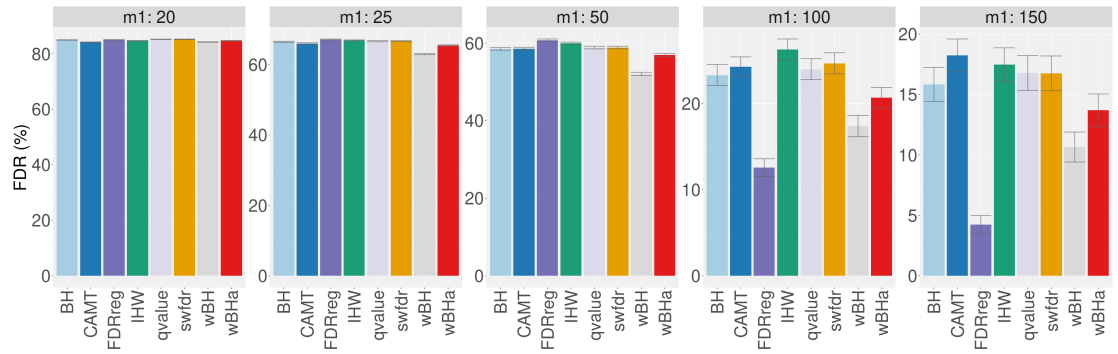

**Figure S20.** FDR comparison in **scenario 2**, with simulations based on **real data**, for different  $m_1$  values. Vertical bars illustrate standard errors.

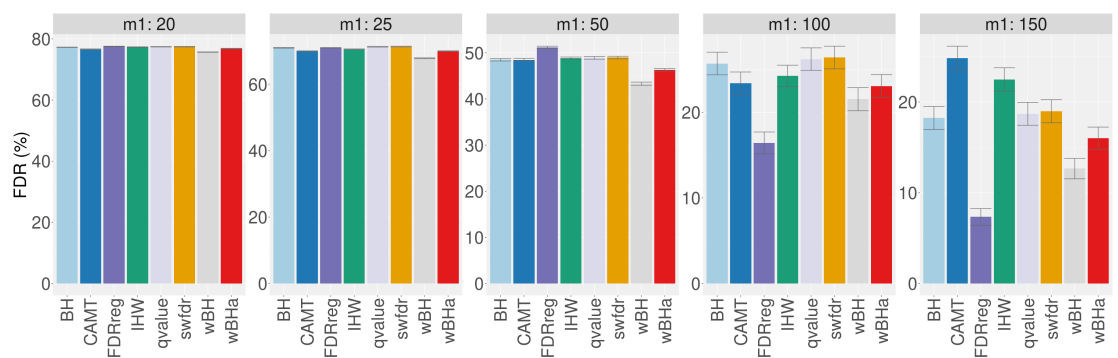

**Figure S21.** FDR comparison in **scenario 3**, with simulations based on **real data**, for different  $m_1$  values. Vertical bars illustrate standard errors.

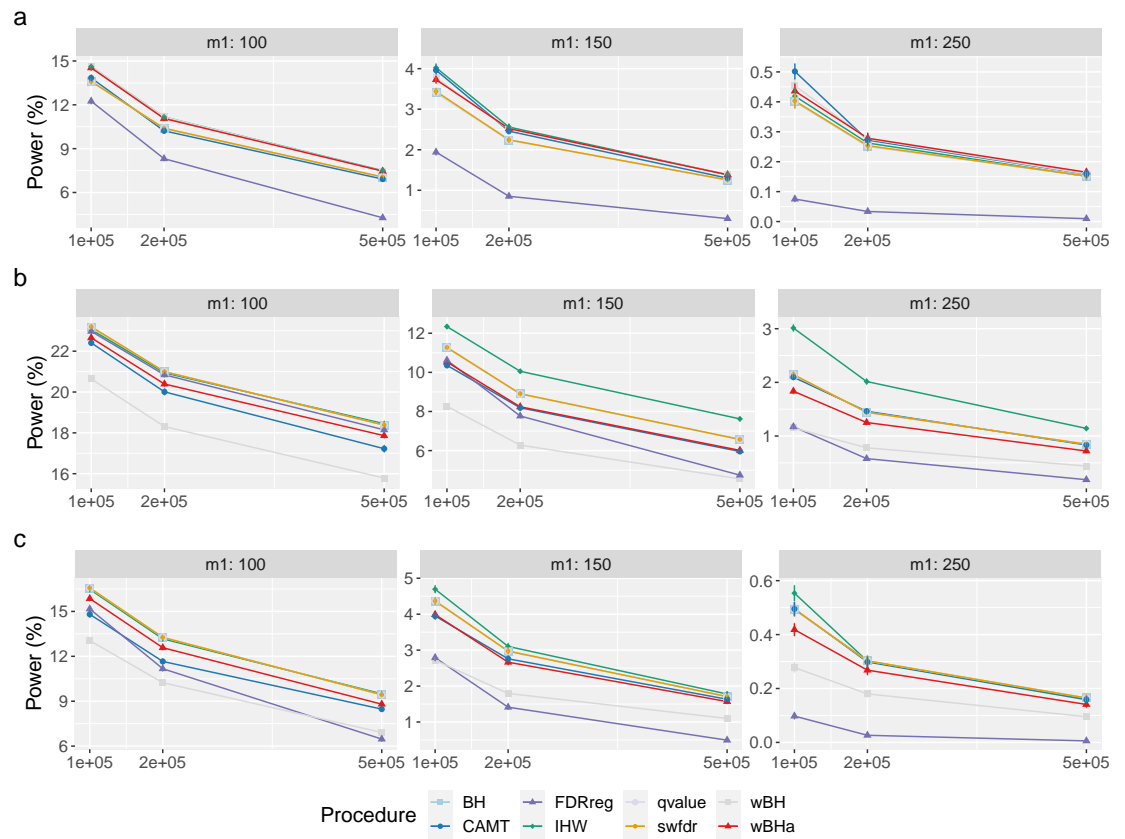

**Figure S22. Overall power** comparison with independent markers for **large  $m$**  values and  $m_1$  values with quantitative phenotype. Panels a, b and c display results for scenario 1, scenario 2 and scenario 3, respectively. Vertical bars illustrate standard errors.



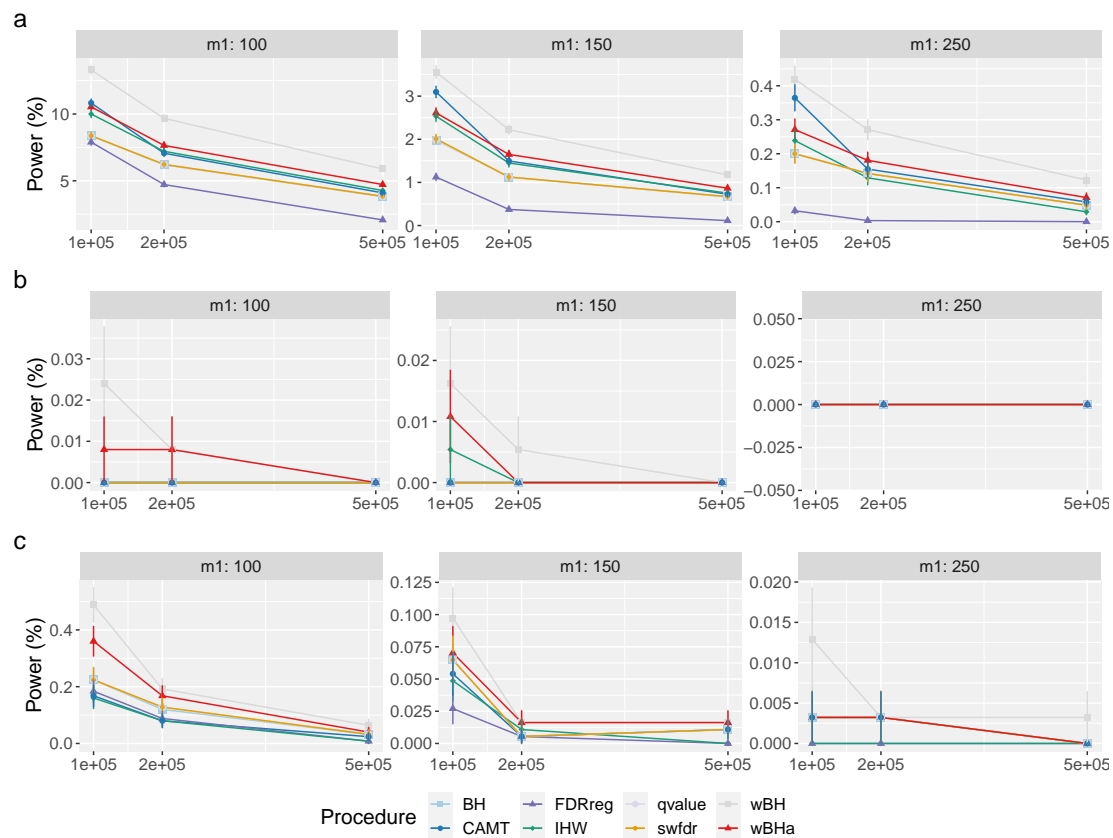

**Figure S23.** Power comparison in subgroup of **rare variants** with independent markers for **large  $m$**  values and  $m_1$  values with quantitative phenotype. Panels a, b and c display results for scenario 1, scenario 2 and scenario 3, respectively. Vertical bars illustrate standard errors.

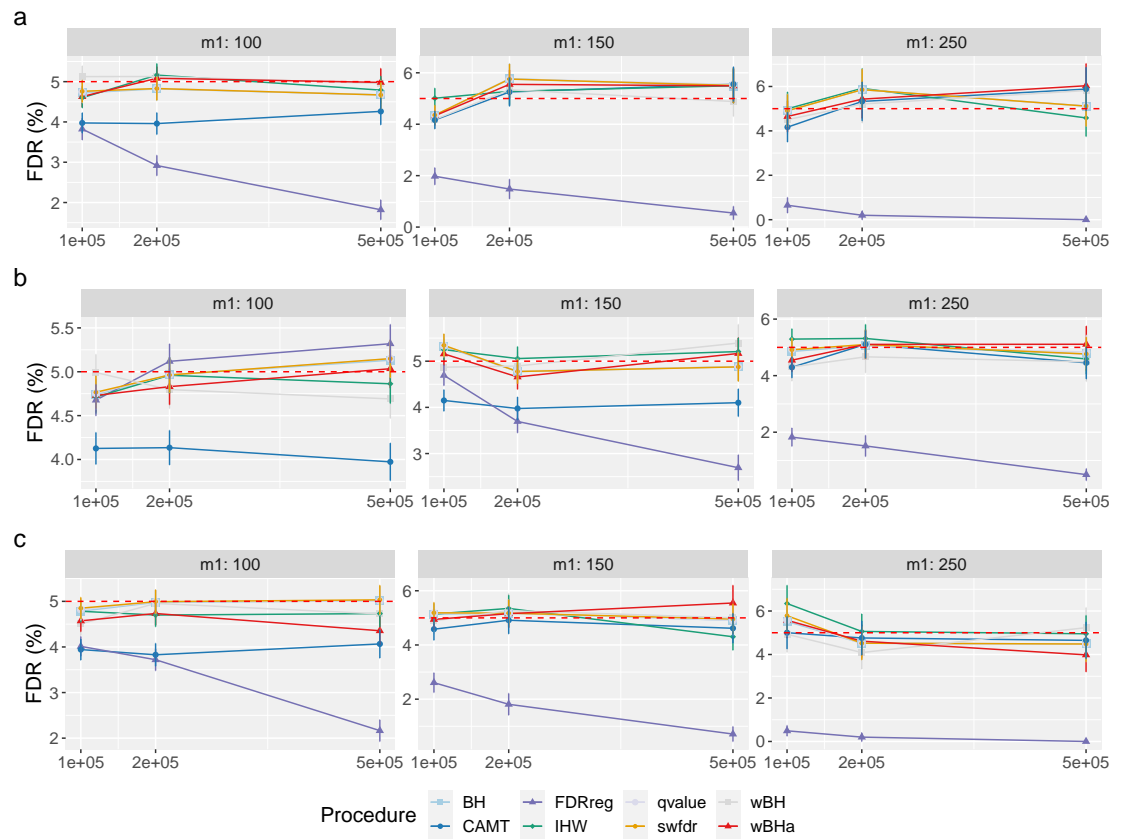

**Figure S24. FDR** comparison with independent markers for **large  $m$**  values and  $m_1$  values with quantitative phenotype. Panels a, b and c display results for scenario 1, scenario 2 and scenario 3, respectively. Vertical bars illustrate standard errors.

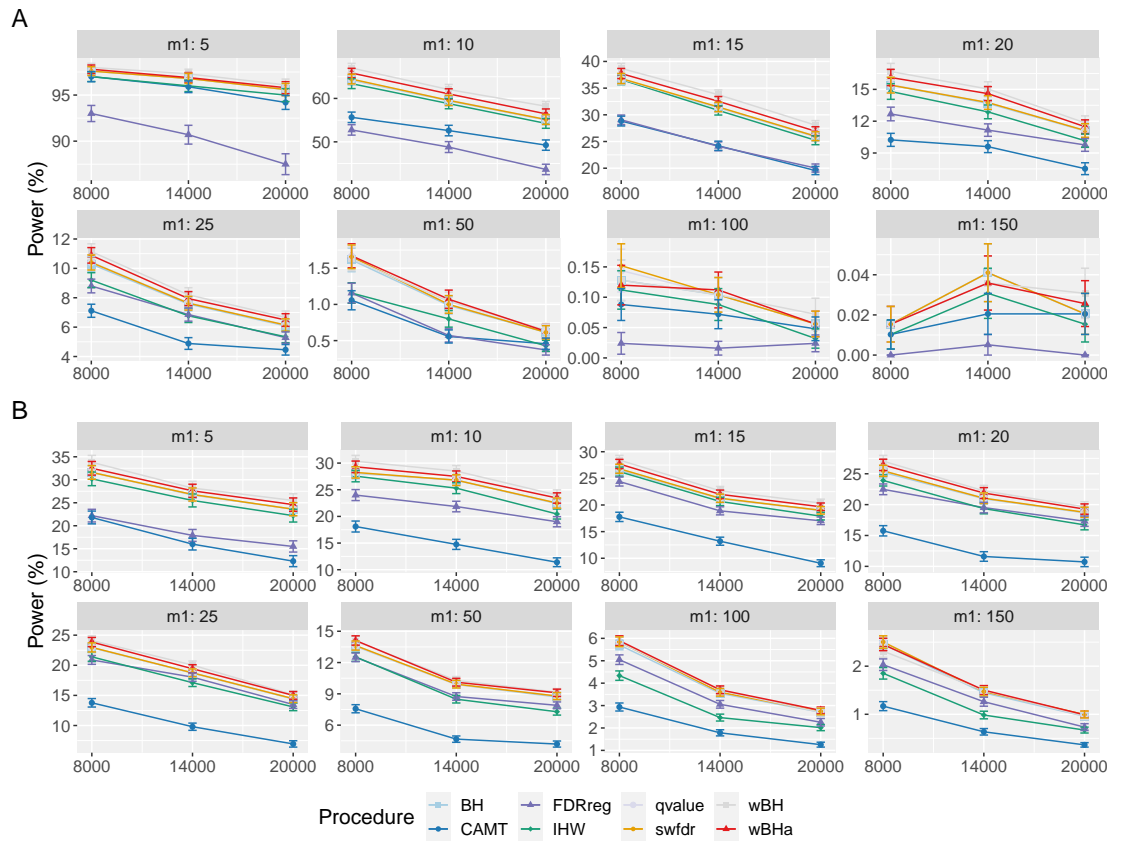

**Figure S25.** Power comparison in subgroup of **common variants** when using **1/MAF** as covariate in **scenario 1** with independent markers for different  $m$  and  $m_1$  values. Panels A and B display results for quantitative and binary traits, respectively. Vertical bars illustrate standard errors.

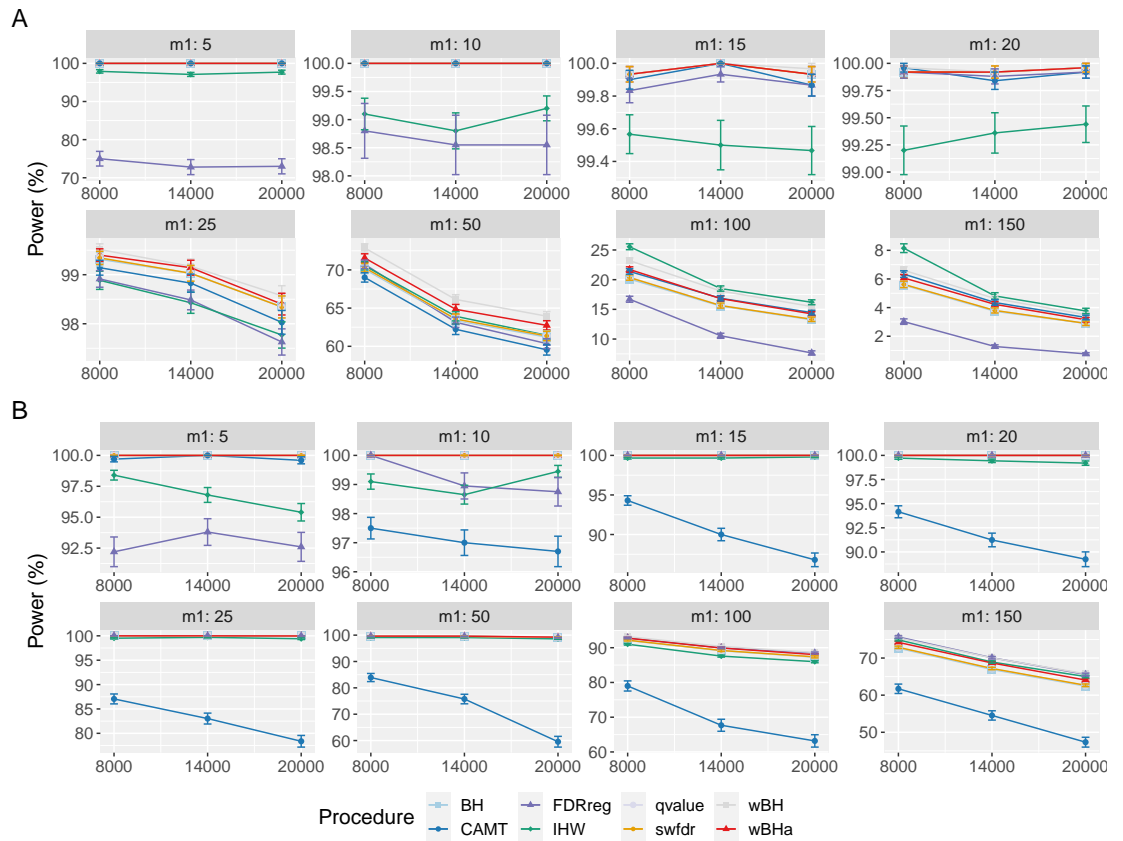

**Figure S26.** Power comparison in subgroup of **common variants** when using **1/MAF** as covariate in **scenario 2** with independent markers for different  $m$  and  $m_1$  values. Panels A and B display results for quantitative and binary traits, respectively. Vertical bars illustrate standard errors.

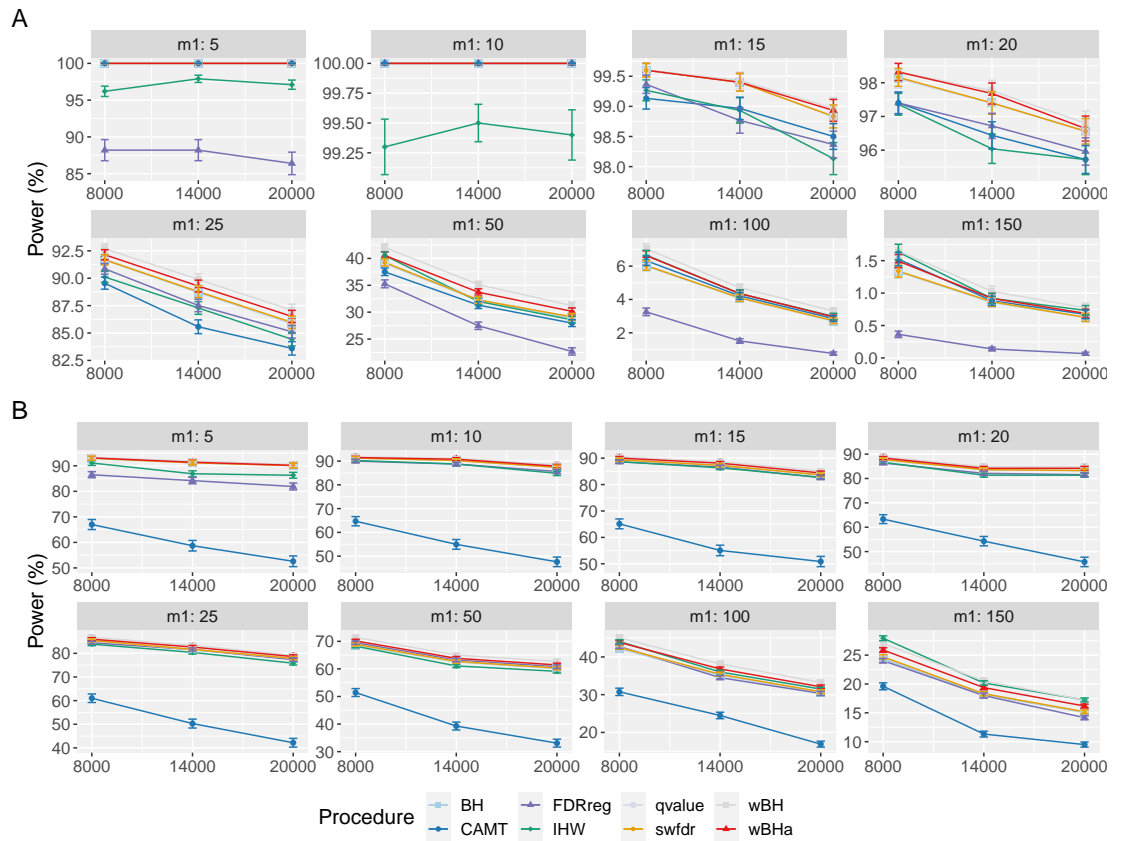

**Figure S27.** Power comparison in subgroup of **common variants** when using **1/MAF** as covariate in **scenario 3** with independent markers for different  $m$  and  $m_1$  values. Panels A and B display results for quantitative and binary traits, respectively. Vertical bars illustrate standard errors.

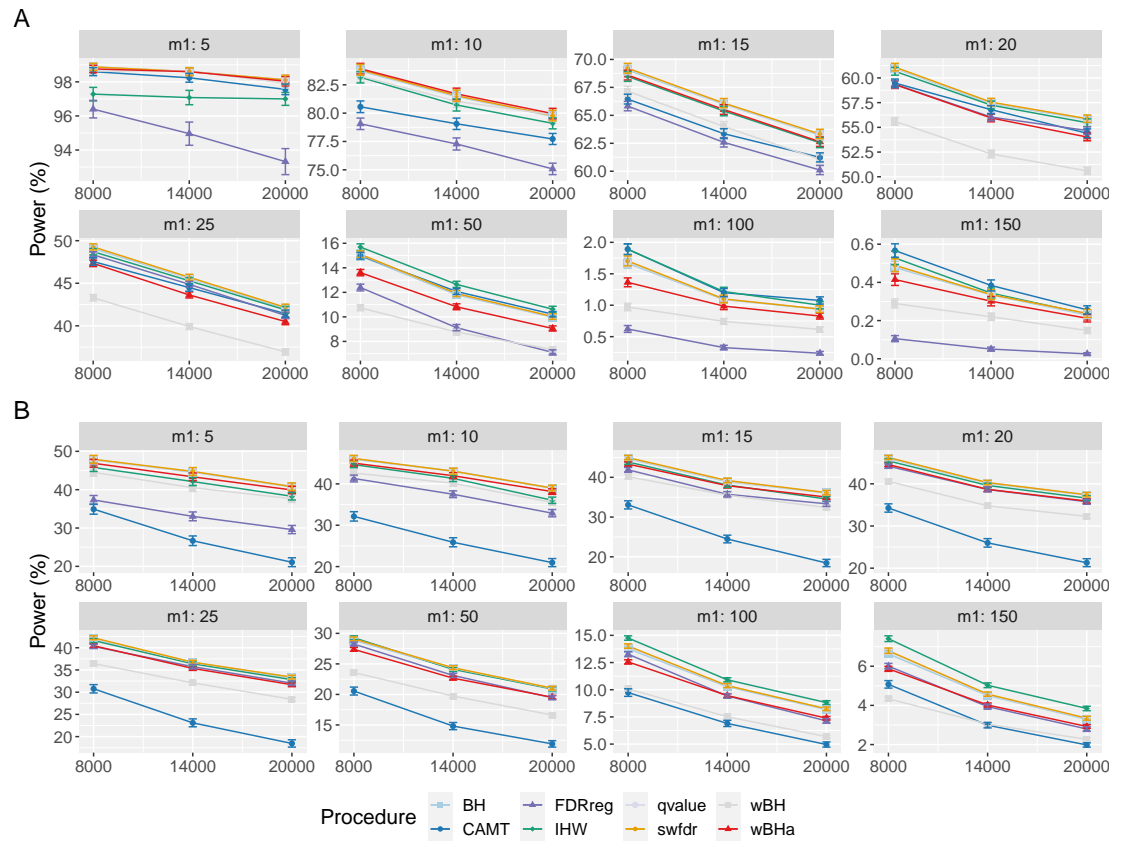

**Figure S28. Overall power** comparison when using  $1/MAF$  as covariate in **scenario 1** with independent markers for different  $m$  and  $m_1$  values. Panels A and B display results for quantitative and binary traits, respectively. Vertical bars illustrate standard errors.

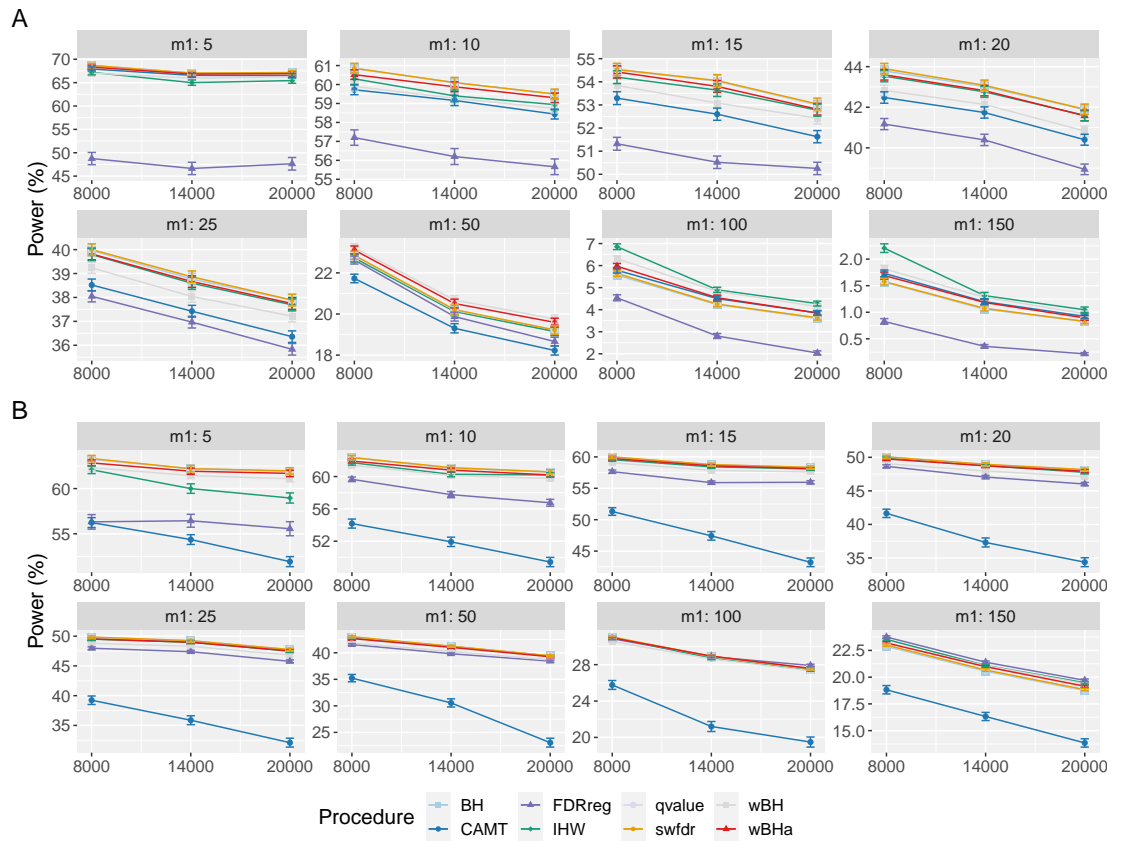

**Figure S29. Overall power** comparison when using  $1/MAF$  as covariate in **scenario 2** with independent markers for different  $m$  and  $m_1$  values. Panels A and B display results for quantitative and binary traits, respectively. Vertical bars illustrate standard errors.

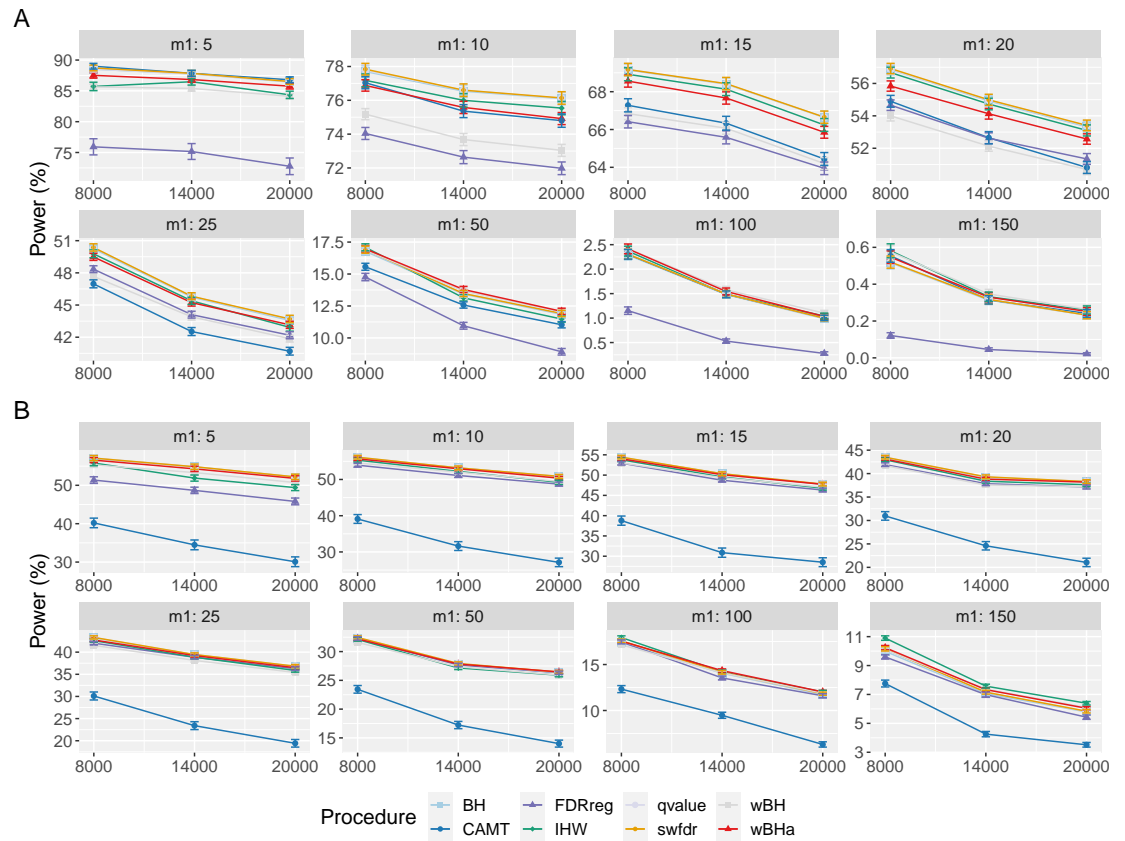

**Figure S30. Overall power** comparison when using  $1/MAF$  as covariate in **scenario 3** with independent markers for different  $m$  and  $m_1$  values. Panels A and B display results for quantitative and binary traits, respectively. Vertical bars illustrate standard errors.



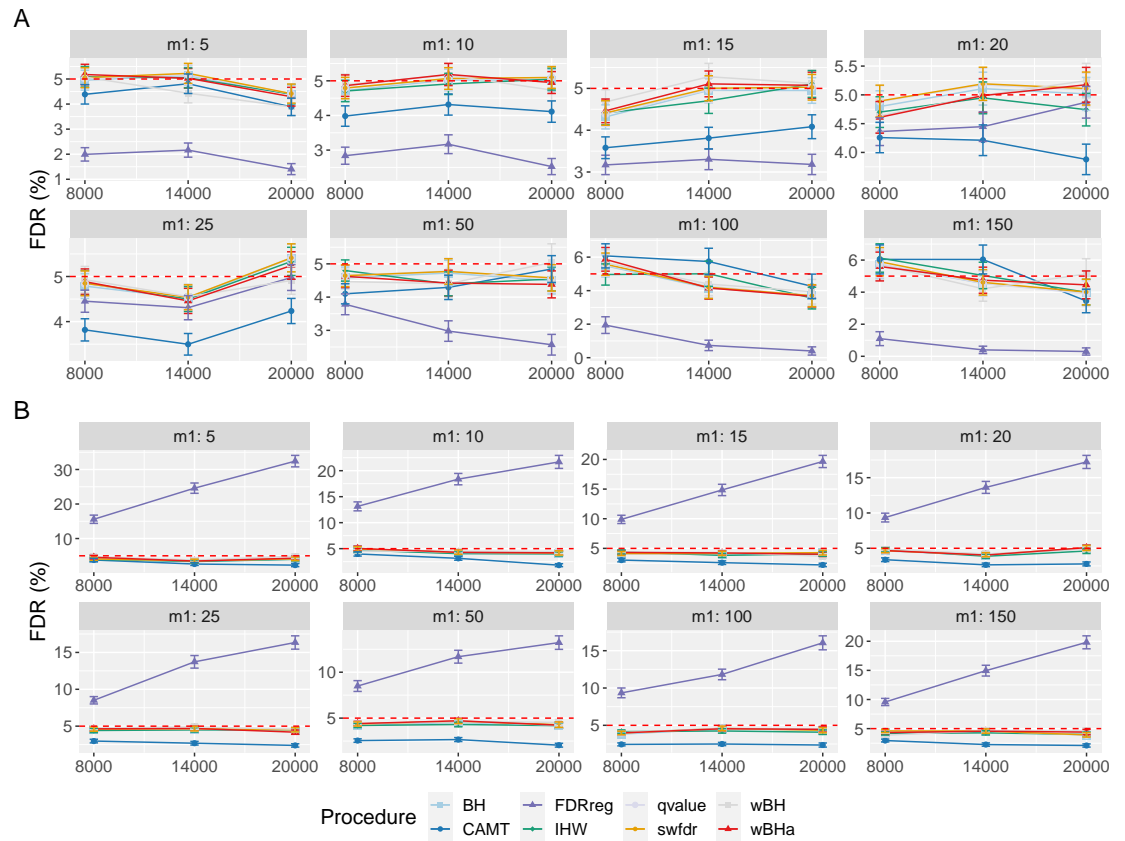

**Figure S31. FDR comparison when using  $1/MAF$  as covariate in scenario 1 with independent markers for different  $m$  and  $m_1$  values. Panels A and B display results for quantitative and binary traits, respectively. Vertical bars illustrate standard errors.**

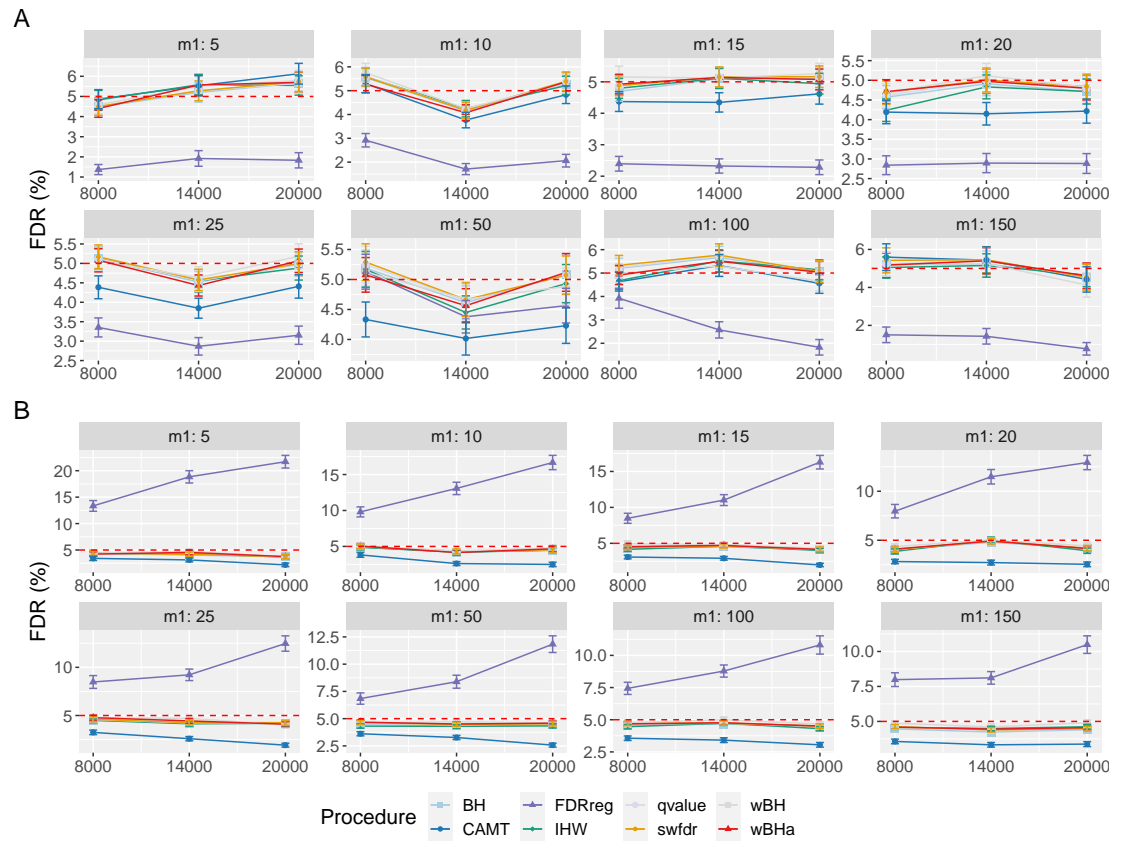

**Figure S32. FDR comparison** when using **1/MAF** as covariate in **scenario 2** with independent markers for different  $m$  and  $m_1$  values. Panels A and B display results for quantitative and binary traits, respectively. Vertical bars illustrate standard errors.

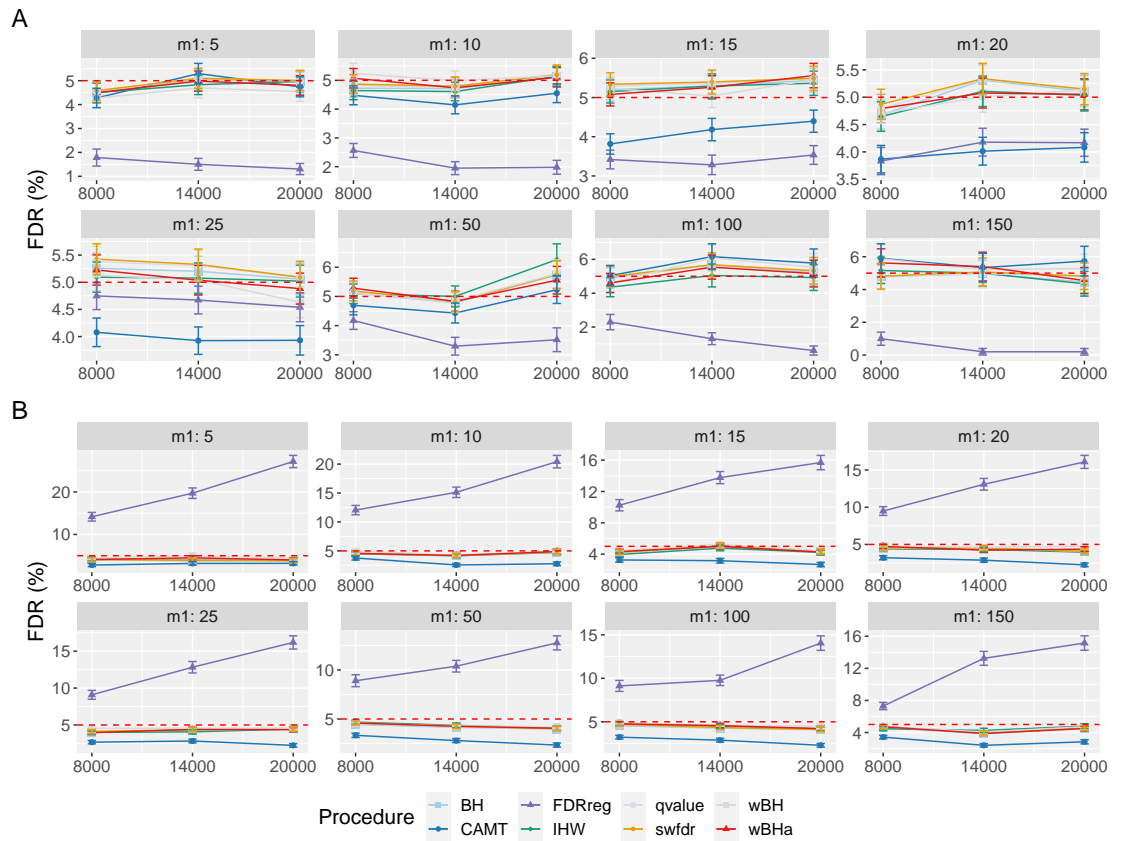

**Figure S33. FDR comparison** when using  $1/MAF$  as covariate in **scenario 3** with independent markers for different  $m$  and  $m_1$  values. Panels A and B display results for quantitative and binary traits, respectively. Vertical bars illustrate standard errors.

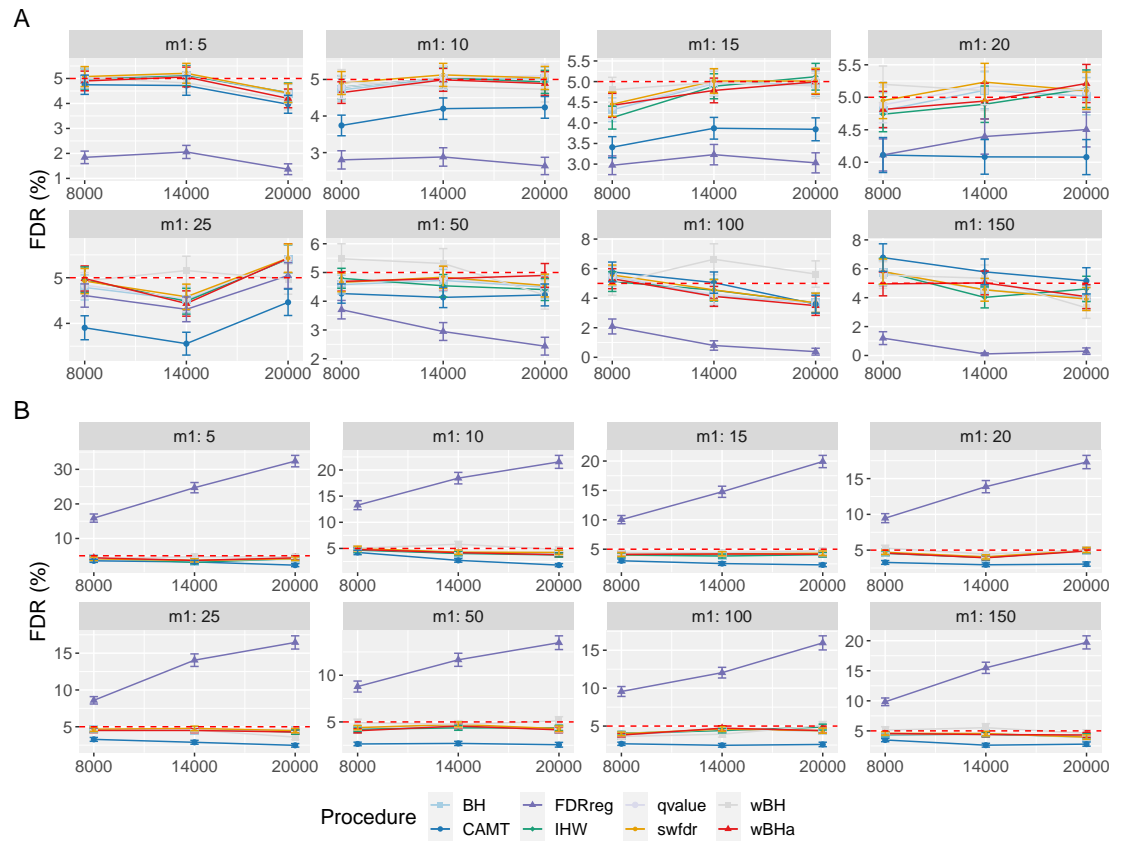

**Figure S34. FDR comparison** when using **uninformative** covariates in **scenario 1** with independent markers for different  $m$  and  $m_1$  values. Panels A and B display results for quantitative and binary traits, respectively. Vertical bars illustrate standard errors.

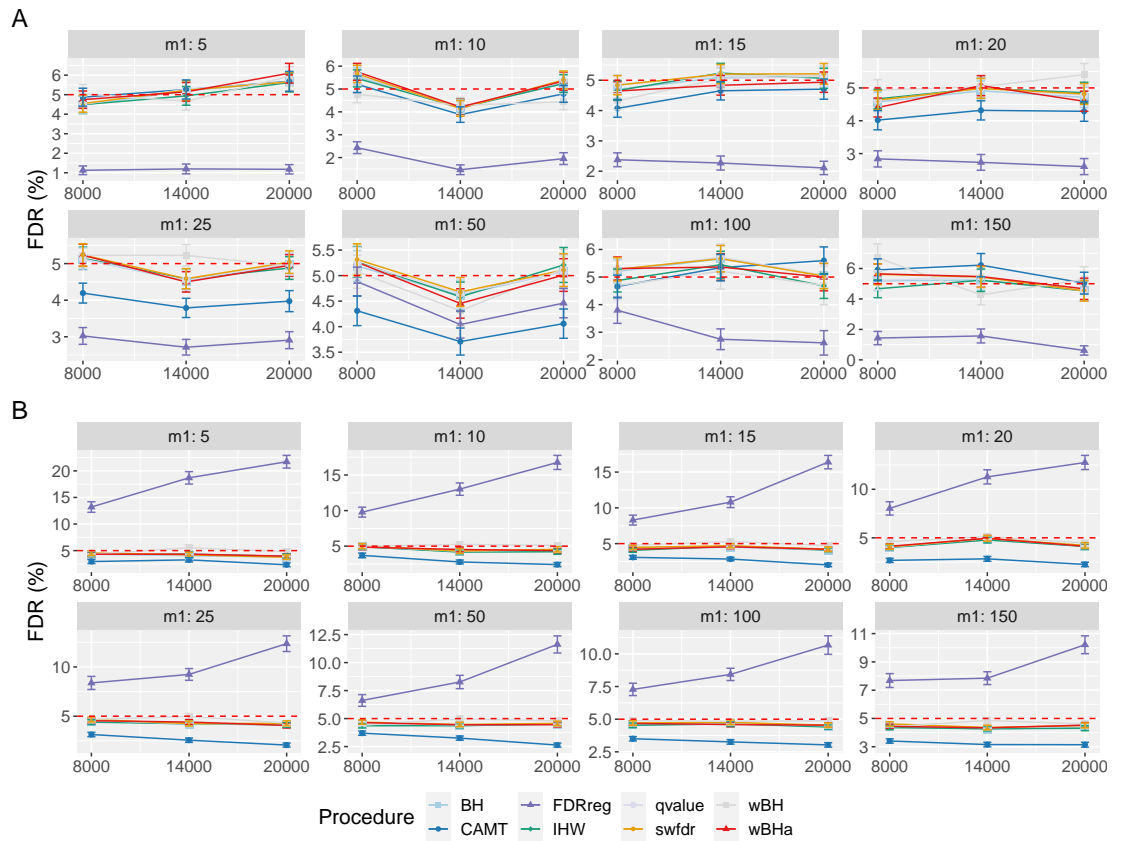

**Figure S35. FDR comparison** when using **uninformative** covariates in **scenario 2** with independent markers for different  $m$  and  $m_1$  values. Panels A and B display results for quantitative and binary traits, respectively. Vertical bars illustrate standard errors.

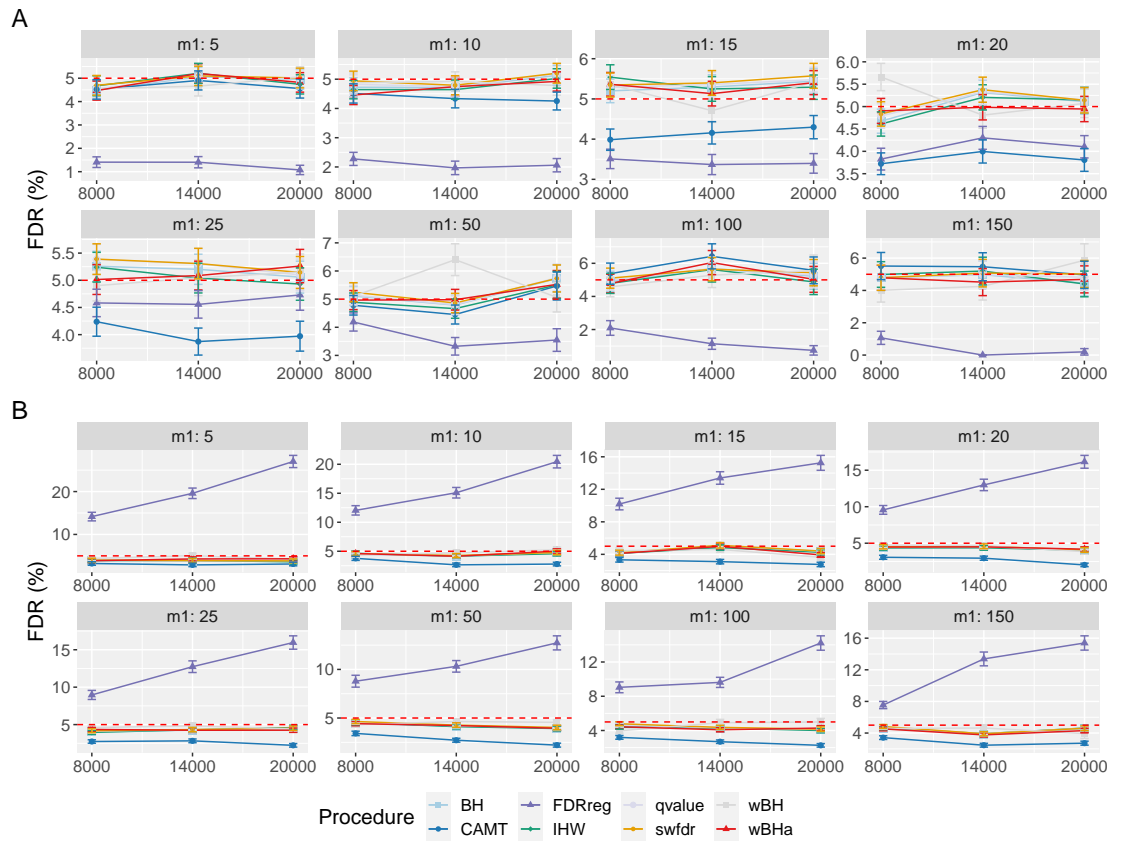

**Figure S36. FDR comparison** when using **uninformative** covariates in **scenario 3** with independent markers for different  $m$  and  $m_1$  values. Panels A and B display results for quantitative and binary traits, respectively. Vertical bars illustrate standard errors.

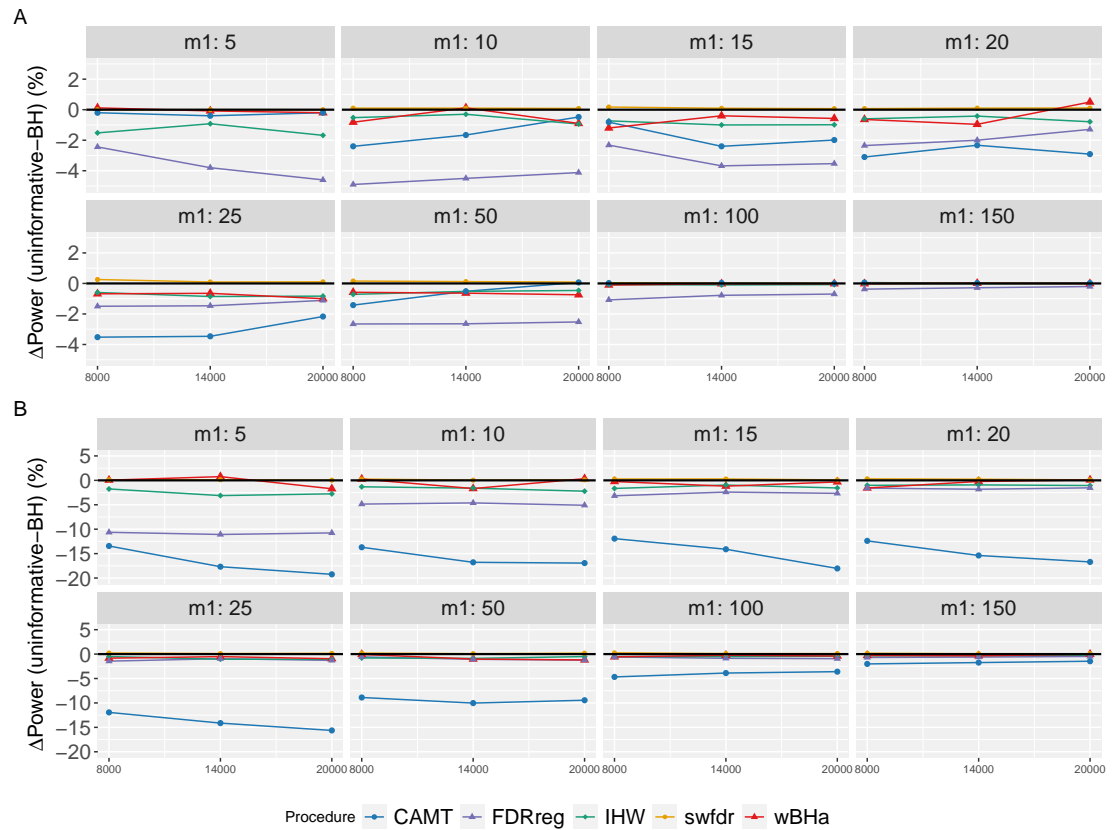

**Figure S37. Overall power difference** between uninformative covariates and BH procedure in **scenario 1** with independent markers for different  $m$  and  $m_1$  values. Panels A and B display results for quantitative and binary traits, respectively.

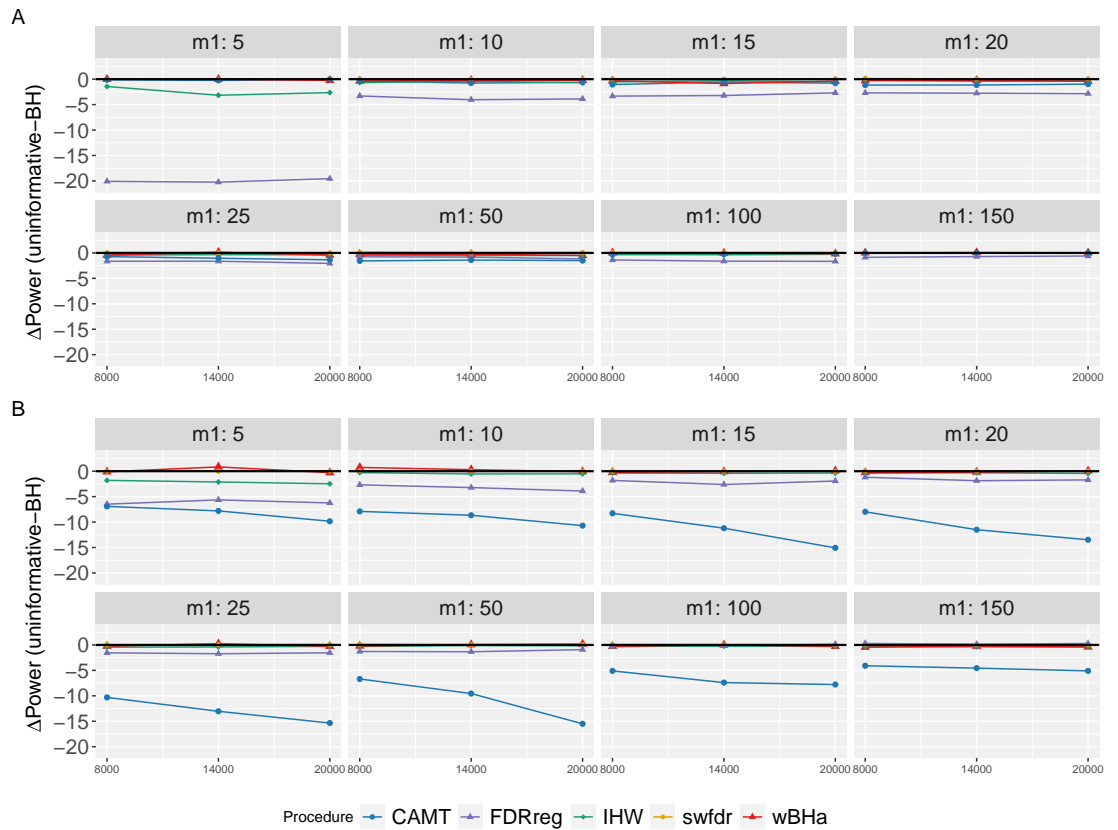

**Figure S38. Overall power difference** between uninformative covariates and BH procedure in **scenario 2** with independent markers for different  $m$  and  $m_1$  values. Panels A and B display results for quantitative and binary traits, respectively.



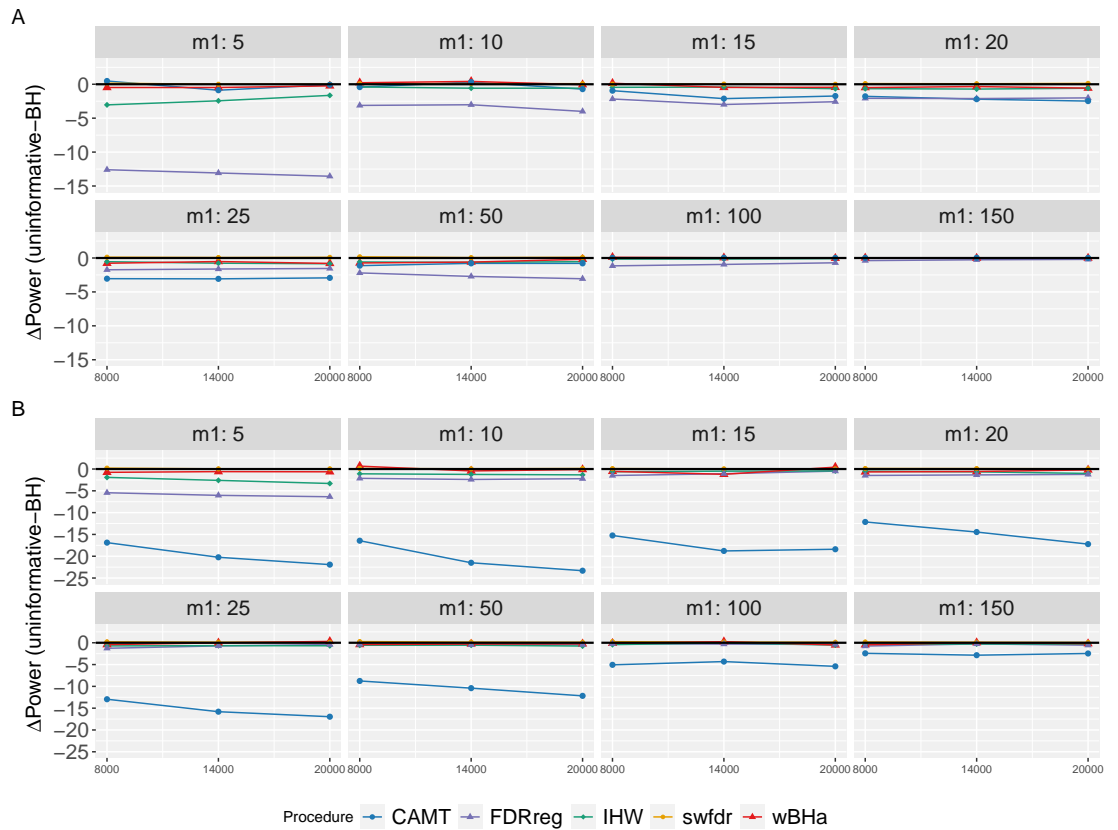

**Figure S39. Overall power difference** between uninformative covariates and BH procedure in **scenario 3** with independent markers for different  $m$  and  $m_1$  values. Panels A and B display results for quantitative and binary traits, respectively.

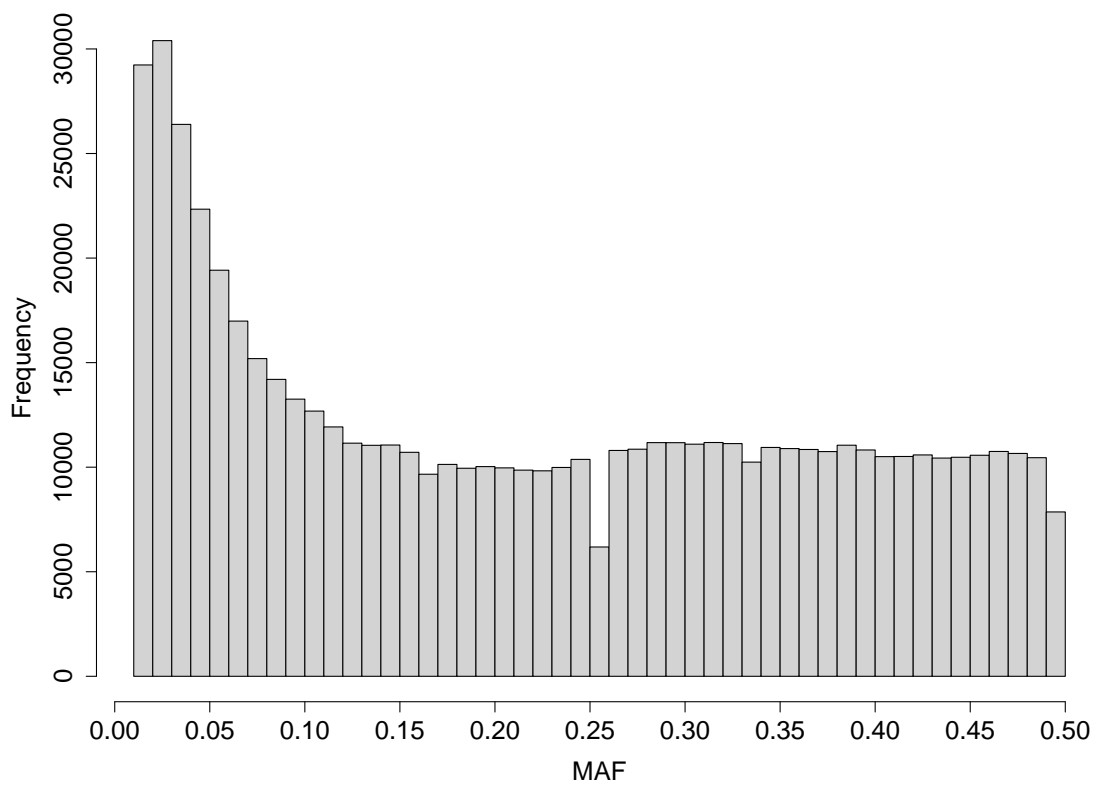

**Figure S40.** MAF distribution of all SNPs for the Crohn's disease dataset.
